# Supplementary material for: Cortex-specific transcriptome profiling reveals upregulation of interferon-regulated genes after deeper cerebral hypoperfusion in mice
Source: Front Physiol. 2023 Mar 13;14:1056354. doi: 10.3389/fphys.2023.1056354 (PMC10040763; doi:10.3389/fphys.2023.1056354)
Supplement: Supplementary file 1 [file Table2.xlsx]

## Sheet: limma
Gene name	Log2FC	Padj
Chrnb3	-2.19948	0.0110825
2310015D24Rik	-2.04346	0.00501446
1700047F07Rik	-1.9898	0.0157699
Hjv	-1.98016	0.00650959
Gm31946	-1.89992	0.033549
Gm13601	-1.89163	0.0235661
Myl4	-1.85474	0.00510422
Gm31518	-1.80495	0.0176257
C730002L08Rik	-1.80294	0.00178096
Npas4	-1.79247	0.0282115
Gm49932	-1.79137	0.013822
Trpv6	-1.7467	0.0142805
Erfe	-1.73431	0.0118886
Xirp2	-1.72578	0.0464866
Gm15870	-1.70613	0.0304864
F630042J09Rik	-1.67213	0.0199943
Gm47415	-1.66715	0.0380599
Lct	-1.66509	0.00991956
Gm32939	-1.64175	0.0307857
5330416C01Rik	-1.63405	0.048041
Gm40518	-1.60395	0.0293026
Rpe65	-1.58987	0.0224851
Gm43684	-1.58585	0.0339624
Gm3279	-1.57277	0.0101804
Gm9946	-1.57235	0.0289408
Npc1l1	-1.56175	0.0282588
Jsrp1	-1.55078	0.00904735
Neu2	-1.53323	0.00878391
Myod1	-1.53021	0.0380895
Sowahb	-1.52836	0.0151583
Pus3	-1.52391	0.0146619
4930578G10Rik	-1.52086	0.0169014
Gm30648	-1.51743	0.028477
9130024F11Rik	-1.50659	0.0216707
Lamp5	-1.50611	0.0071494
Gm14051	-1.50568	0.0105464
Dalir	-1.50502	0.0153601
Gm42743	-1.50069	0.0182079
Gm9924	-1.49949	0.030041
AI115009	-1.48876	0.0237667
Cpne9	-1.47269	0.0152776
Kcnk4	-1.45936	0.0157361
Gipc3	-1.45254	0.0211302
Theg	-1.44559	0.0371255
Gm17853	-1.42652	0.0177151
Adra1d	-1.42648	0.0127571
Krt12	-1.42381	0.0445539
Gm20628	-1.42191	0.0249899
B530045E10Rik	-1.42165	0.0392526
Gm10334	-1.41516	0.0285261
Plekhs1	-1.41273	0.0249844
Gm12428	-1.38795	0.021522
Gm2464	-1.38495	0.0424835
Gm20208	-1.38182	0.0250596
Gm17891	-1.38178	0.0270479
Gm29587	-1.37923	0.00961924
Wnt10a	-1.37922	0.0302133
Mylk3	-1.37793	0.00870739
Taf7l	-1.37603	0.0497507
Gm29674	-1.37511	0.0250866
Myh1	-1.37133	0.0365082
Inhbe	-1.36233	0.0179418
Gng13	-1.35603	0.024861
1700101I11Rik	-1.35127	0.0335917
Ackr2	-1.35089	0.0252252
Tgm3	-1.34578	0.0320026
Gm17322	-1.33435	0.0187021
Gm35161	-1.33042	0.0113349
Diras2	-1.33001	0.011988
Lrrc6	-1.32949	0.00868864
Tectb	-1.31794	0.0390435
Gm48932	-1.31602	0.0122932
Nrn1	-1.31294	0.0231571
1110032F04Rik	-1.30235	0.00856945
Smim43	-1.2961	0.0126129
Spag6	-1.28333	0.0280008
Cckbr	-1.27291	0.0238199
Gm15688	-1.27278	0.0446103
Gm9899	-1.27064	0.0122932
Rcvrn	-1.26263	0.0281673
Gm25857	-1.26198	0.0441761
AI593442	-1.26178	0.0202332
Mei1	-1.26162	0.0325975
Satb2	-1.25692	0.0450042
Gm5105	-1.25498	0.0336668
Gm4724	-1.25421	0.0335456
9330121K16Rik	-1.25418	0.0129971
Hkdc1	-1.25257	0.0122932
Myh7b	-1.2469	0.0288464
Adgrd1	-1.24564	0.00977333
Alox12b	-1.24459	0.0196978
Cck	-1.24341	0.0126578
Gm49415	-1.23842	0.0370641
Kcnv1	-1.23718	0.0129971
Gm46633	-1.23562	0.0420911
Tmem132d	-1.23297	0.010957
Nrgn	-1.23288	0.0271834
Wnt9a	-1.2328	0.0212471
Capn12	-1.22912	0.0363999
Chrm3	-1.22833	0.0277991
Rspo1	-1.22769	0.0336668
Lemd1	-1.22689	0.0032388
Kcnab3	-1.22648	0.0160528
Hapln4	-1.22621	0.0345802
Gm15721	-1.22399	0.0488818
Gm26684	-1.22382	0.0234799
D930019O06Rik	-1.22111	0.0206352
Cabp1	-1.2184	0.0118803
Gm45533	-1.21533	0.0258334
Exph5	-1.21433	0.0182278
Kirrel2	-1.21408	0.00573029
Rtn4r	-1.21388	0.0436994
Gm29506	-1.2128	0.0422535
Gm42433	-1.20984	0.0249295
Gm48530	-1.2085	0.0070556
Tbr1	-1.20825	0.0220596
Rgs4	-1.20687	0.0163523
Car10	-1.20682	0.017749
Pak5	-1.20296	0.0295411
Klhl40	-1.19651	0.0153601
Adra1b	-1.19598	0.0151583
1700108N11Rik	-1.1954	0.0381729
Asb11	-1.19352	0.0136093
Cabyr	-1.19281	0.0297191
Hipk4	-1.18745	0.0245819
Hs3st2	-1.18649	0.0167203
Cadps2	-1.18439	0.0208853
Kcnh7	-1.18104	0.014014
D030055H07Rik	-1.17691	0.0297178
Rph3a	-1.17573	0.013537
Tmem215	-1.1719	0.0496681
Cbln2	-1.17045	0.0116917
Tmem196	-1.17044	0.00651972
Gm49937	-1.16628	0.0436005
Gjd2	-1.16439	0.00558601
Gfra2	-1.16223	0.01229
Gm884	-1.15462	0.0351444
Gm45579	-1.1528	0.0205122
Gm37824	-1.15269	0.031025
Nptx2	-1.15165	0.0110394
Kcnc3	-1.15038	0.0189128
Vsnl1	-1.15008	0.0365788
Vxn	-1.1483	0.0177855
Efna5	-1.14512	0.010286
Rgsl1	-1.14458	0.036661
Mlip	-1.14139	0.0217185
Ephb6	-1.14066	0.0218952
Gm20063	-1.1397	0.0462832
Gm34583	-1.13906	0.043999
Trhde	-1.13881	0.042388
Adcyap1	-1.13739	0.00758868
Emx1	-1.13625	0.0279962
Mal2	-1.12873	0.0275722
Snap25	-1.12815	0.0224792
A830009L08Rik	-1.12568	0.0258334
Rnf39	-1.12474	0.0373001
Efcab6	-1.12143	0.0168496
Gm49731	-1.12096	0.0369462
Gm2824	-1.11856	0.018764
Egr3	-1.11811	0.0173416
Gucy2g	-1.1163	0.015028
Lingo1	-1.11566	0.0341378
Camk2n1	-1.11565	0.0214907
Fhod3	-1.11156	0.024662
Rims3	-1.10994	0.0129971
Pcsk2	-1.10679	0.0333721
F830208F22Rik	-1.10646	0.0350627
Atp2b2	-1.10622	0.0118379
Gm39271	-1.10433	0.0192733
Dhcr24	-1.10372	0.0248891
Stx1a	-1.09975	0.0249409
Camk1g	-1.09922	0.0122694
Syndig1	-1.09891	0.00664876
Dkkl1	-1.09613	0.0297247
Abcc8	-1.09551	0.0377772
Kcnj9	-1.09471	0.0495626
Epop	-1.09399	0.0172449
Gm19410	-1.09365	0.0234555
Brinp1	-1.0919	0.0194116
Gm48819	-1.09156	0.0116653
Lpcat4	-1.09129	0.0087781
Gm42741	-1.08764	0.00759696
Ptpn3	-1.08763	0.0306665
Gm48123	-1.0864	0.0297178
Slitrk1	-1.08389	0.0233926
Kcng2	-1.08221	0.0338373
3110053B16Rik	-1.07764	0.0142503
Hspa1l	-1.07607	0.0168496
Hecw2	-1.07527	0.0212842
Gm6117	-1.07424	0.0350602
Hcrtr1	-1.07318	0.0486383
Gm12312	-1.07309	0.0220596
Slc24a2	-1.07188	0.0136367
Gm44116	-1.0711	0.0129971
Dact2	-1.07026	0.0238199
Kcnq5	-1.06702	0.00808478
4930588K23Rik	-1.06434	0.0126784
Ephx4	-1.06377	0.0284293
Gpr21	-1.06055	0.00987406
Nos1ap	-1.06049	0.0262969
Kcns1	-1.06012	0.0197797
Hecw1	-1.05982	0.0326442
D430041D05Rik	-1.05854	0.0294302
Crhbp	-1.05556	0.0352725
Grin2a	-1.05122	0.0123546
Golga7b	-1.05095	0.0146619
Adcy1	-1.05044	0.0492389
Allc	-1.05015	0.0469967
Kalrn	-1.04766	0.0247705
Galnt9	-1.04742	0.0408029
Mkx	-1.04374	0.0196572
9130002K18Rik	-1.04139	0.0376389
Gpr150	-1.04116	0.0481507
Cdh6	-1.0411	0.00330886
Mapk11	-1.04076	0.00862664
Itpka	-1.03736	0.0318254
Rapgef4	-1.03704	0.0151775
Ipcef1	-1.03425	0.0152152
Kcnj3	-1.03285	0.0166812
Stard4	-1.03206	0.0158789
Serinc2	-1.028	0.0183477
C130074G19Rik	-1.02712	0.00745567
Tmem178	-1.02712	0.0426055
Kcnj11	-1.02672	0.0264279
Dcst1	-1.02583	0.0261747
Nefm	-1.02468	0.0288328
Kcnk3	-1.02362	0.0136093
Col19a1	-1.02356	0.0281695
Htr2a	-1.02088	0.0107764
Sstr3	-1.02068	0.00400374
Frzb	-1.02047	0.00184356
Scn1a	-1.02005	0.030553
Mc1r	-1.01694	0.0103388
Gm37711	-1.01658	0.0114999
Gm42902	-1.01474	0.0218952
Olfm2	-1.01454	0.0149931
1110002E22Rik	-1.01365	0.0221207
Gm48623	-1.01137	0.0267973
Rims1	-1.01128	0.0192937
Tmem239	-1.0101	0.040744
Mmp17	-1.01007	0.00978414
Fhl2	-1.00923	0.00524049
Necab3	-1.00878	0.0090762
Sv2b	-1.00858	0.0461213
Galntl6	-1.0083	0.0152865
Cacng3	-1.00499	0.0255292
Sgtb	-1.00395	0.0297191
Mical2	-1.00042	0.0158789
Mpp3	-1.0003	0.00738634
Gcnt4	-1.00021	0.0198912
Camkk2	-1	0.00588988
Slc2a10	1.00001	0.0254998
Arhgap24	1.00032	0.0289981
Cracr2a	1.00039	0.0327387
Ano6	1.00071	0.00898752
Serp1	1.00116	0.01618
Magt1	1.00153	0.018677
Resf1	1.00238	0.0179118
Pgd	1.00352	0.0104076
Gm37163	1.0046	0.00524827
Spata6	1.00524	0.0486165
Calhm2	1.00557	0.0175892
Tlr3	1.00635	0.012343
Gm28720	1.00661	0.0387574
Slc39a1	1.00687	0.00924912
Gm45059	1.01098	0.0467138
Ccnd1	1.01174	0.00401996
Pdia4	1.01295	0.0249551
Sod3	1.01331	0.0223675
Lrrc32	1.01338	0.0168821
Foxc1	1.014	0.0214261
Gm7890	1.01403	0.0403235
Myo9b	1.01449	0.0139603
Zfp691	1.01494	0.0424835
Tnfsf10	1.01506	0.0229784
Rp2	1.01592	0.0178402
Tfeb	1.01645	0.0258253
Fmo2	1.01704	0.0204716
Mtbp	1.01735	0.0165462
Tmed3	1.01748	0.0136128
3222401L13Rik	1.0185	0.0158417
Mcl1	1.02047	0.0119455
Fut1	1.02135	0.0389214
Frmd4b	1.02163	0.0147334
Tor1aip1	1.02168	0.0086006
Inpp4b	1.02216	0.0152776
4931440P22Rik	1.02261	0.0473608
Creb3l1	1.02272	0.0481507
Eml3	1.02344	0.00750418
Sgk1	1.02356	0.0142424
A4galt	1.02402	0.0342877
Hoga1	1.02452	0.0493447
Cd9-ps	1.0246	0.0210154
Mical1	1.02488	0.03125
Galnt10	1.02655	0.00808478
Sugct	1.02666	0.00845998
Csk	1.02729	0.0253111
Slc41a3	1.02738	0.00882665
Ttc12	1.02761	0.0333392
Naga	1.02805	0.00856945
Npepl1	1.02965	0.0108614
Aga	1.03007	0.0202182
Btg1	1.03138	0.0209223
Fcgrt	1.03414	0.0114441
Pdlim2	1.03521	0.0298867
Dpy19l4	1.0354	0.00741681
Brip1os	1.0358	0.0147127
Tnfrsf11a	1.03623	0.0267507
Dpyd	1.03643	0.0236342
Gpr182	1.03669	0.0275231
Eef2kmt	1.03776	0.0455774
Prelp	1.03936	0.0053461
H2-K2	1.04166	0.0432595
Flna	1.04187	0.0135403
C1qtnf1	1.04334	0.0165103
AI838599	1.04417	0.0442956
Gm45837	1.0442	0.0142227
Galnt7	1.04512	0.00174754
Ctdsp1	1.04523	0.00284438
Itpr2	1.04524	0.00731061
Oas1h	1.04568	0.0310807
Mcm6	1.04796	0.00808478
Ednrb	1.04925	0.0116653
Ephx1	1.04976	0.00882665
Hif1a	1.05021	0.0113104
Bmp6	1.05058	0.00339264
Fadd	1.05126	0.0333848
Nexn	1.05183	0.036894
Plagl2	1.05233	0.0118379
Gm44735	1.05435	0.0492784
Smoc1	1.05515	0.0037336
Creb3l2	1.05691	0.00726288
Gm4961	1.05774	0.0229815
Sema3d	1.05783	0.0103388
Cebpb	1.0579	0.0244266
Arhgef40	1.05943	0.0059073
Mdk	1.06179	0.00588086
Aldh16a1	1.06233	0.0216972
Mob3a	1.06409	0.0482405
Plcb3	1.0657	0.00605215
Tpp1	1.06575	0.00751496
Manba	1.06627	0.0174413
Capza1	1.06752	0.00975282
Snx9	1.06896	0.0159112
Mov10	1.06939	0.00765184
Nedd1	1.0697	0.0158217
H3c15	1.06991	0.0492177
Hcar1	1.07009	0.0292047
Stard9	1.07151	0.00376244
Nxn	1.07159	0.00733926
Cep85	1.07216	0.00992079
Srebf1	1.07268	0.00855394
Stat2	1.07286	0.0119294
Ip6k3	1.07474	0.0257672
Matn4	1.07507	0.0118379
Chd7	1.07586	0.0082617
Tmem104	1.07702	0.00628103
Dbi	1.07796	0.00534659
Gm9869	1.07959	0.0229435
Shisa5	1.07972	0.0217185
Gm1110	1.07991	0.0460015
Crlf3	1.08248	0.00684431
Cep192	1.08256	0.00400374
Ttc7	1.08424	0.0269032
Islr	1.08513	0.030041
Stat3	1.08601	0.00638817
Ankrd44	1.08694	0.0121812
Crybb1	1.0873	0.0377772
Ddx31	1.08835	0.00733926
Padi2	1.08866	0.00788899
Slc16a1	1.08903	0.00918862
Pabpc1	1.08967	0.00831365
Rps15a-ps3	1.09032	0.0114622
Osr1	1.09041	0.049256
Lrig1	1.09342	0.00127308
Gm16144	1.09342	0.0321295
Stard5	1.09354	0.0365915
Vat1	1.09376	0.01618
Rbp1	1.09399	0.0136782
Prorsd1	1.09456	0.0146763
Smo	1.09564	0.00404739
2610203C22Rik	1.09611	0.0107335
Pxn	1.09717	0.00978414
Adm	1.09766	0.028477
Hc	1.09796	0.041924
Ankrd13a	1.09814	0.00904614
Adrb2	1.1008	0.0165557
Lamb1	1.1008	0.0085015
St8sia6	1.1024	0.0129971
Tnxb	1.1026	0.00330886
Sulf1	1.10365	0.0309666
Gm16230	1.10405	0.0373001
1810062G17Rik	1.10531	0.0426036
Cd82	1.10669	0.0147628
Psme1	1.10758	0.00436983
Snx18	1.10996	0.00415309
Ajuba	1.11027	0.026552
H2-T22	1.11264	0.0129955
Aldh1a1	1.11264	0.03125
Tnfaip8	1.11316	0.0135403
Card19	1.11321	0.009557
Id3	1.1135	0.0122154
Gm43714	1.11396	0.0333721
Zfp984	1.11437	0.0241533
Cav1	1.11567	0.00726288
Slc46a3	1.11648	0.0149522
Kifc1	1.11791	0.0380705
Itga11	1.1191	0.031028
Gm9888	1.11952	0.0406492
Nectin4	1.12182	0.0272711
Ehd2	1.1231	0.0202535
Lamp1	1.12334	0.0110261
Ggt5	1.1241	0.0247711
Gm17491	1.12552	0.0265964
Zap70	1.12795	0.0433126
Prlhr	1.12821	0.0299395
Tyms	1.12839	0.0249844
Foxj1	1.12881	0.0142072
Gm44758	1.12885	0.0485307
Nagpa	1.12943	0.0193197
H2bc6	1.1303	0.012426
A930001M01Rik	1.1308	0.0316872
Ticam1	1.13126	0.00674125
Casp7	1.13229	0.0203128
Cntrl	1.13247	0.004841
Lims1	1.13356	0.00384798
Gbp4	1.13359	0.0407911
Ggh	1.13378	0.01326
Uaca	1.13399	0.0181603
Ston1	1.13566	0.018954
5430430B14Rik	1.13694	0.0258352
Zic4	1.13726	0.0435016
Plekho2	1.13793	0.0299395
Plpp2	1.13805	0.0273473
Aox3	1.13951	0.0378804
Gm46546	1.13979	0.0123546
Plekhf1	1.13998	0.0377547
Ppp1r14b	1.14044	0.00603274
Gm16015	1.14175	0.0362863
St6gal1	1.14247	0.0117885
Serpinb9	1.14325	0.00710949
Agtrap	1.1435	0.00876037
4930455G09Rik	1.14362	0.0376789
Cand2	1.14406	0.00460361
Lima1	1.14415	0.0122932
Gltp	1.14526	0.0148772
Slc7a2	1.14558	0.0132158
Prdm9	1.14599	0.0302133
Il6st	1.14761	0.0069354
Adamtsl4	1.14868	0.0227678
Ap1g2	1.14915	0.0236101
Aox1	1.15018	0.00215146
Itih5	1.1536	0.0135974
Col6a2	1.1541	0.00276928
Map3k1	1.15457	0.0387812
Fkbp10	1.15585	0.0105464
Rhog	1.15602	0.0267169
Dpp7	1.15619	0.00664876
Tns3	1.1562	0.0109728
Bmp4	1.15664	0.0165224
Asah1	1.15717	0.0118886
Alox15	1.15732	0.0305674
Gm44710	1.15813	0.0242886
Olfr460	1.1584	0.0108924
Fkbp7	1.15868	0.0349434
Fzd5	1.15898	0.0211336
Gm43362	1.15899	0.048241
Parp4	1.16012	0.0309842
Tirap	1.16458	0.0352725
Txlnb	1.1647	0.0100736
Pag1	1.16522	0.0067778
Cenpl	1.16556	0.0289408
Akap13	1.16583	0.0129971
Glmp	1.16687	0.00736634
Rest	1.16703	0.0214146
Gm6209	1.16769	0.0485307
Igfbp7	1.16806	0.0482405
Spsb2	1.16835	0.0284293
Dera	1.16863	0.0241148
Clec14a	1.1687	0.0160052
Gm16580	1.16908	0.0478095
Rbpms	1.17195	0.0069354
Ednra	1.17215	0.00439359
Castor1	1.17354	0.0398159
Atp7a	1.17402	0.0150466
Elovl1	1.17481	0.017932
Gm15821	1.17481	0.041282
Gm43412	1.17595	0.0279451
Dnali1	1.17687	0.0234278
Sned1	1.17829	0.00971715
Sema3b	1.17833	0.031896
Eva1b	1.17905	0.0455718
Thbs2	1.17964	0.0254998
Vstm4	1.17985	0.0161613
Uap1l1	1.17992	0.0125082
Gjb2	1.1808	0.00918862
Nat2	1.18089	0.0411347
Bco2	1.18247	0.00952894
Aldh3b1	1.18307	0.0129367
Smc4	1.1833	0.00949459
Fam114a1	1.18383	0.00525098
Tpx2	1.18524	0.0305063
Plgrkt	1.18625	0.00578424
Epo	1.18806	0.0472985
Itgb1	1.18893	0.00900716
Ets1	1.18896	0.00903283
Pfkfb3	1.18929	0.0180641
Ly6e	1.19051	0.0206962
Haus4	1.19101	0.0214907
Mavs	1.19136	0.0113349
Necap2	1.1917	0.0151583
Bach1	1.19465	0.0126017
Ptges	1.1951	0.0233926
Nek6	1.19672	0.00447883
Gm10130	1.19695	0.0354734
Lipo3	1.19698	0.0053461
Dhrs1	1.19703	0.00687343
Cspg4	1.19732	0.00236371
Fam102b	1.19771	0.00532768
Abhd4	1.19867	0.00313312
Kcnj2	1.1988	0.0034331
Vcam1	1.19923	0.0149901
Fxyd1	1.19975	0.00734488
Cyfip1	1.19984	0.00605351
Omd	1.19997	0.0466612
Kirrel	1.19998	0.00541719
Gm41349	1.2007	0.0465957
Gm2a	1.20266	0.005449
Mocos	1.20374	0.0193067
P2ry1	1.20376	0.0443718
Ptbp3	1.2059	0.0131842
Fgd3	1.20627	0.0221012
Cd151	1.20757	0.00488691
Itpkb	1.20781	0.00333169
Foxf1	1.20813	0.0190626
Arhgap18	1.2083	0.00538108
Rel	1.21034	0.0182352
Fibin	1.2104	0.0234774
Tcaf2	1.21285	0.0345802
Foxm1	1.21474	0.0153848
Nod1	1.21479	0.00952004
Nfatc2	1.21489	0.0131905
Fstl1	1.21576	0.0118379
Pilrb2	1.21589	0.0333811
Lamc3	1.21609	0.0064833
Edem2	1.21657	0.0121405
Esyt1	1.21772	0.0266098
Lonrf3	1.21956	0.016319
Bag3	1.22012	0.0130745
Adamts1	1.22094	0.0142144
Gm38091	1.22103	0.0487387
Gm19689	1.22204	0.016359
Col16a1	1.22708	0.00205789
Epb41l2	1.22938	0.00508721
Dmbx1	1.23059	0.0481507
Glb1	1.23115	0.0066994
Pnp	1.2316	0.0168496
Prcp	1.23322	0.00882665
Maml2	1.23474	0.00695444
Cdt1	1.23543	0.02396
Myzap	1.23592	0.0284293
Mfsd1	1.23708	0.00902415
Ptgfr	1.23755	0.0305656
Sh3pxd2b	1.23758	0.00991956
Gstm2	1.24015	0.0414543
Nid2	1.24114	0.0270479
Thbd	1.24191	0.00501543
Plekhg2	1.24288	0.0122932
Ccdc170	1.24329	0.0446831
Prkch	1.24449	0.0297191
Fam107b	1.24586	0.0210184
Gm17092	1.24666	0.0395181
Mapkapk2	1.24785	0.00558983
Gm38155	1.25002	0.0277348
Ptbp1	1.2517	0.00593888
Tpbgl	1.25198	0.0267973
Ccdc190	1.2543	0.00541343
Myc	1.25525	0.0181036
Tm4sf1	1.25746	0.00434945
Hoxb4	1.25813	0.0455977
Snap23	1.25957	0.0152303
Rrm2	1.26146	0.0390143
Lrp10	1.26155	0.00582423
Gm43162	1.26162	0.0443718
Zfp36l2	1.26249	0.00583135
Igf2	1.26289	0.0297288
Myl12a	1.26306	0.0116917
9130214F15Rik	1.26564	0.0064833
Gypc	1.26579	0.028477
Lepr	1.26587	0.0117127
Ccdc163	1.26602	0.0436758
Slc10a3	1.26616	0.0447373
Cubn	1.26626	0.0323699
Gm46540	1.26939	0.0121767
Naprt	1.27081	0.00991956
Plod3	1.27114	0.00578446
Prrx1	1.27242	0.00212279
Agt	1.27375	0.0306665
Zfp607a	1.27379	0.0270039
Tmem252	1.27489	0.0186237
Gm2237	1.2752	0.0295725
Nr1h3	1.27532	0.00995313
Pear1	1.27631	0.0179418
Gm33543	1.27642	0.034375
Fuca1	1.27691	0.0043641
Tead3	1.27701	0.013537
Snhg18	1.27751	0.0140981
Bicc1	1.28079	0.00758868
Nr1h4	1.2816	0.0236913
Klrb1f	1.28336	0.0475539
Glis3	1.28371	0.00382068
Rhoc	1.28385	0.00895288
Gm10369	1.28426	0.0145656
Sdc4	1.2845	0.00775469
Vkorc1	1.28466	0.0271519
Notch2	1.28518	0.00642908
Cln5	1.28694	0.00788899
Slc2a5	1.28833	0.0109728
Rab29	1.28841	0.0153717
Nuf2	1.28931	0.0227678
Gm49703	1.28995	0.0221012
Gm6545	1.29084	0.0270119
Kctd12	1.291	0.00612149
Nt5dc1	1.29171	0.018341
Nbeal2	1.29248	0.00663316
Gpr137b	1.2937	0.0123544
Pdcd1lg2	1.29381	0.0235661
Ddr2	1.29412	0.00376244
Alx4	1.29421	0.0387812
Gm10532	1.29485	0.0276921
Nfatc4	1.29755	0.0129367
Scarf2	1.29834	0.00780233
Krt83	1.29857	0.0397683
Ildr1	1.30006	0.0371255
Nfkbiz	1.30232	0.0125082
Gm16617	1.30308	0.0372061
Shc1	1.30545	0.00998085
H2-T10	1.30601	0.0376389
Ninj1	1.30741	0.0196613
Rnf135	1.30752	0.0129971
Ccdc102a	1.30761	0.0126131
Cnn3	1.3083	0.00447883
Arap3	1.30874	0.00593995
Tead2	1.30905	0.00902415
Stom	1.30973	0.00358015
Sqor	1.30999	0.0267183
Prps1l1	1.31068	0.0305858
Smim3	1.31127	0.0251851
Cttnbp2nl	1.3116	0.00396522
Clec10a	1.31192	0.0486383
Selenop	1.31226	0.00845998
Pm20d1	1.31399	0.0345802
Gm28901	1.31439	0.0261728
Prdx6	1.31518	0.00779651
Arsi	1.31576	0.0424835
Palld	1.31726	0.018578
Cfap43	1.318	0.0250666
Sh2b2	1.31939	0.0158406
Tifa	1.31969	0.0256368
B3gnt5	1.31972	0.0294302
Plscr1	1.32103	0.0321786
Heatr5a	1.32154	0.0154882
Gm15538	1.3239	0.00664876
Gm31520	1.32466	0.0354868
Hspb6	1.3247	0.0133871
Dchs2	1.32506	0.0480302
Znf41-ps	1.32541	0.0160867
Rarres2	1.32626	0.0211318
Crtap	1.32667	0.0170416
Gm44620	1.32673	0.0441335
Nrp1	1.32739	0.0108898
Bcl2l14	1.32761	0.0274161
Angpt1	1.3278	0.0086649
Car5b	1.32845	0.00582423
Cela1	1.32861	0.0174055
Hspg2	1.32865	0.0160867
Tpm4	1.32909	0.00751745
Gm19710	1.32919	0.0483881
Myh9	1.33066	0.0106401
Bcl2l11	1.33314	0.0218467
Eya4	1.33403	0.0155125
Hic1	1.33419	0.0118694
Naalad2	1.33428	0.0426036
Pla2g4c	1.33445	0.0483849
Pld1	1.33507	0.0041857
Slc8b1	1.33524	0.0132572
Mertk	1.33549	0.0064833
Tbx18	1.33621	0.0122932
Gm3828	1.33658	0.0486098
D130058E05Rik	1.33687	0.0119294
Rgs22	1.33755	0.0411347
Klra14-ps	1.33781	0.020549
Slc47a1	1.33932	0.0193197
Col4a1	1.33952	0.0149213
Pla2g4a	1.33986	0.0197046
Cd177	1.33996	0.0310807
Cxcl11	1.34012	0.0233926
Spdl1	1.34016	0.0168821
Ormdl2	1.34427	0.0168496
Fmod	1.34464	0.00166612
Rftn1	1.34471	0.0116653
Anxa5	1.34492	0.00882665
Ccdc121rt3	1.34582	0.0275505
Gm49599	1.34686	0.0328559
Gm45838	1.34746	0.0478763
P3h2	1.3475	0.0158417
Efemp2	1.34847	0.012388
Tnfsf12	1.34892	0.0336094
Serpind1	1.35102	0.00854343
Angptl2	1.35149	0.00188137
Cped1	1.35225	0.00949459
Lpo	1.3523	0.031084
Gm48293	1.35252	0.0182079
Amz1	1.35332	0.00475175
Soat1	1.35379	0.00499844
Galm	1.35488	0.0326444
Rflna	1.35541	0.0469144
Meox1	1.35588	0.0495828
Fnip2	1.35633	0.00315384
Trpm6	1.35828	0.0373001
Ckap2l	1.35834	0.036894
Thbs4	1.35907	0.00309553
Dynlt1f	1.35969	0.0229063
Aldh1a2	1.35988	0.00491964
Plekhf2	1.36003	0.0033043
Crabp2	1.36191	0.0122932
Trgc2	1.36197	0.019974
Gxylt2	1.36198	0.00978414
BC064078	1.36424	0.0233926
Tax1bp3	1.36497	0.0117782
Rhoj	1.36577	0.0129367
Gpr141b	1.36863	0.0470035
Lrrc3	1.37012	0.00284438
Serpine2	1.37019	0.00333169
Fbn1	1.37051	0.0182268
Evi2a	1.37277	0.0104498
Lrp5	1.37312	0.00654636
P2rx4	1.37353	0.0370297
Gm43221	1.3741	0.0377772
Trib3	1.37455	0.0431603
Slc25a43	1.37465	0.0343873
Serpinb6c	1.37512	0.0323135
Zfp36l1	1.37513	0.00353938
Cpq	1.37542	0.00535471
Gm42793	1.37564	0.0482405
Fmo5	1.37618	0.0129989
4833411C07Rik	1.37887	0.0338018
Gm11992	1.37913	0.0164516
Cln3	1.37987	0.00493586
Akr1b8	1.37989	0.0302476
Galnt15	1.38068	0.00305681
Hmgb2	1.38085	0.0152776
S1pr2	1.38094	0.0489005
Adamts7	1.38169	0.0345802
Ephx3	1.38584	0.0420911
Anxa9	1.38618	0.0441761
Vav2	1.38623	0.0117127
Cst3	1.38922	0.00515085
Lama1	1.39017	0.0152776
Gem	1.3902	0.0145753
Gm15157	1.39065	0.00654958
Klk8	1.39154	0.028477
Lamp2	1.39338	0.00582423
Map4k1	1.39759	0.0333392
Mrgprf	1.39849	0.0433126
Gpr137b-ps	1.40018	0.00943057
Galnt4	1.40082	0.00419286
Pla2g2d	1.40122	0.0266998
Dapp1	1.40242	0.0034331
Nrap	1.4038	0.0296545
Acads	1.40409	0.0037336
Gm13291	1.40464	0.0200131
Jpt2	1.40612	0.0155033
Gpc2	1.40716	0.0420911
Tnfaip3	1.40911	0.00518198
Gm20743	1.41014	0.0332351
Tmem123	1.41132	0.0151583
AY512915	1.41378	0.0119294
Igtp	1.41404	0.025836
Adh1	1.41414	0.045721
Cd80	1.41479	0.0158417
Gm16499	1.4151	0.0179281
Rin2	1.41656	0.0027012
Fgf2	1.41666	0.0064833
Fgfbp1	1.41682	0.0200822
Skap2	1.41715	0.00583135
Galnt12	1.41776	0.029796
Nsl1	1.418	0.0293728
Daw1	1.41934	0.0392526
Neat1	1.42478	0.00900716
Foxd1	1.4257	0.0179418
Itga6	1.426	0.00757948
Pdlim4	1.42831	0.00267322
Arhgap17	1.42966	0.00424597
Gm15931	1.43008	0.0441567
Clec1a	1.43057	0.0335456
Iqgap1	1.43083	0.0163252
Angptl3	1.4314	0.0227691
Vamp5	1.43194	0.0172501
Rab39	1.43302	0.0118283
Gm42778	1.43361	0.024895
Zfhx3	1.43418	0.00307888
Tent5a	1.43431	0.00670828
Hfe	1.43495	0.0371142
Foxc2	1.43614	0.0142144
H1f2	1.43717	0.0059338
Cd93	1.43723	0.0308135
Pcolce	1.43767	0.0118694
Six2	1.43806	0.0229652
Pou2f2	1.43813	0.00223889
Orai1	1.43817	0.00515085
4930447K03Rik	1.43894	0.0492177
Rcbtb2	1.43896	0.0050384
Niban1	1.43908	0.0214146
Loxl4	1.43928	0.0448754
1810034E14Rik	1.43938	0.0254998
Dse	1.4412	0.0168496
Nt5dc2	1.44121	0.0129039
Gm14040	1.44153	0.0282115
Myct1	1.44229	0.0172752
Dock11	1.44264	0.00544806
Lif	1.44361	0.0441768
Mr1	1.44375	0.00621591
Pbxip1	1.44412	0.00370709
Gm13657	1.4453	0.00805052
Map3k14	1.44682	0.00787004
Il27	1.44686	0.0223432
Cenpe	1.44873	0.0172374
Rbm38	1.45039	0.016359
Nmi	1.45078	0.0132866
Kif11	1.45612	0.0267936
Pxdc1	1.45627	0.00508721
Ppl	1.45724	0.0206962
Tspan4	1.45866	0.00247726
Cflar	1.46059	0.00554587
Card6	1.46115	0.0129367
Wdr62	1.46247	0.0181172
H2-DMa	1.46261	0.00288969
Wasf2	1.4644	0.00481551
Trbv1	1.46483	0.0126905
Ctla2a	1.46559	0.0407648
Gm20612	1.46736	0.0322983
Cpxm1	1.46941	0.0214907
Uhrf1	1.47051	0.0294992
Prg4	1.47218	0.00419517
Vwa5a	1.47558	0.00411865
Ddx11	1.47751	0.0205545
H2-T24	1.47784	0.00304572
Sall3	1.47823	0.0164529
Ncaph	1.47887	0.024861
Kif20b	1.4806	0.0282115
BC035044	1.48069	0.0150448
Fzd7	1.48351	0.00466531
Dcxr	1.48363	0.0153496
Csf2ra	1.4845	0.00733716
Loxl3	1.48478	0.00597191
Reep4	1.48529	0.0198933
Plin4	1.48575	0.0233926
Gm10790	1.48679	0.00419286
Cdh1	1.48719	0.00195352
Gimap1	1.48999	0.0377772
Gm128	1.49056	0.0358543
Tmem176b	1.49208	0.00767906
Ifi27	1.49408	0.000920975
Asgr2	1.49412	0.00920424
Gbp9	1.49422	0.0167865
Relb	1.49443	0.0200741
Pla2g15	1.49684	0.00232922
Mxd3	1.49723	0.0223414
1700009J07Rik	1.49917	0.0145753
Nfkbie	1.49931	0.0389214
Lgals1	1.50009	0.0133812
Arrdc4	1.50023	0.0047257
Mmp11	1.50071	0.021511
Itih2	1.50109	0.025642
Heatr9	1.5011	0.00925722
Cd4	1.50242	0.0414684
Igfbp2	1.50294	0.0129367
Gbp7	1.50493	0.00582423
Gm28286	1.50529	0.0439771
Aldh1l2	1.50718	0.0077126
Map3k8	1.50842	0.0131054
Cyp26b1	1.50869	0.035594
Spon2	1.51327	0.0235319
Cmtm6	1.51355	0.00305681
Lpar6	1.51622	0.00533837
H4c3	1.51739	0.0207402
Mrap	1.51742	0.0157496
Txnip	1.51868	0.00937418
4930523C07Rik	1.52013	0.00935997
Rrbp1	1.52032	0.00550707
Mir17hg	1.52106	0.0284714
Stat6	1.52114	0.00949459
Gm38386	1.52179	0.0107061
Tal1	1.52205	0.010631
Ifit2	1.52332	0.004841
Rbl1	1.52381	0.0131842
E230029C05Rik	1.52468	0.00902415
Hspb8	1.52569	0.00812344
Ror1	1.52584	0.0387812
Tgm2	1.52619	0.0137682
Myd88	1.52651	0.0132254
Phyhd1	1.53074	0.00786793
Depdc1a	1.53088	0.0306467
Col6a3	1.53151	0.0129299
Ahnak	1.53219	0.00534812
Mybph	1.53315	0.0135119
Serpinb6b	1.53335	0.0122191
Clec2d	1.53584	0.0193061
Igfbp5	1.53604	0.00254101
Smagp	1.53625	0.0131842
Ostf1	1.53712	0.00466075
Litaf	1.53768	0.0122932
Lpar2	1.53834	0.0181049
Tex11	1.54017	0.0306126
Erap1	1.54034	0.00578886
Prr33	1.54143	0.0412005
Gm16174	1.54169	0.0249867
Il1r1	1.54323	0.00975282
Il31ra	1.54409	0.0422561
Plod1	1.54483	0.0083332
Fabp7	1.54697	0.0129352
Ifih1	1.54892	0.00883647
Birc5	1.54904	0.0470639
Nfkb1	1.5508	0.00476652
Vrk2	1.55195	0.00904614
Ecm1	1.55229	0.0224338
Bmf	1.55331	0.00808478
Aqp4	1.55458	0.0053461
Prdm1	1.55537	0.0309666
Sbno2	1.55547	0.00411034
Fam169b	1.55645	0.0132254
Nek5	1.55688	0.0406913
Col27a1	1.55712	0.0018163
Ogn	1.55875	0.00558983
Tnfsf13b	1.56248	0.00651881
Efemp1	1.56343	0.00605786
Cd83	1.56367	0.00642908
Gm10392	1.56528	0.00582423
A430057M04Rik	1.56544	0.0212928
Zfp991	1.56637	0.00954325
Colec12	1.57006	0.0123546
Sla	1.57103	0.0109728
Gm11131	1.57545	0.0153266
Cdk6	1.57656	0.00267322
5730471H19Rik	1.57753	0.0425886
Gm1070	1.57849	0.012426
Ripk1	1.57862	0.00808478
Irf1	1.57906	0.0095705
Sall1	1.57913	0.00870739
Svep1	1.57942	0.0170285
Ticrr	1.57999	0.0344713
Gng5	1.58001	0.00216135
Vwf	1.58008	0.00367811
Sytl4	1.58103	0.0179705
Igsf10	1.58163	0.00388247
Gm41611	1.58236	0.0430251
Psme2b	1.58307	0.00596787
Adamts9	1.58376	0.0081332
Ropn1l	1.58497	0.0152776
Prelid2	1.58555	0.0348258
Adam12	1.58598	0.0214146
Slc16a10	1.5911	0.0198912
Sat1	1.59222	0.00335558
Slc44a3	1.59366	0.0208141
Ecscr	1.59493	0.0112793
Plxnb2	1.59642	0.00424597
Fhl3	1.59647	0.0264028
S100a6	1.5978	0.00952126
Piezo2	1.59829	0.0411347
Epha2	1.60034	0.0381851
B3gnt7	1.60053	0.0151075
5830428M24Rik	1.60055	0.0301887
Itpripl1	1.60119	0.027498
Angpt2	1.60152	0.0236101
Gldn	1.60158	0.0114888
Bmp2k	1.60205	0.00333169
1700025N23Rik	1.60237	0.0119532
Echdc3	1.6029	0.0266098
Gm13245	1.60328	0.036455
Slc12a7	1.60764	0.00619977
Rrad	1.60942	0.0250654
Arhgap25	1.60985	0.0053461
Pacc1	1.61083	0.00198459
Dusp27	1.61098	0.0135688
4930469K13Rik	1.611	0.00305681
Arhgap11a	1.61118	0.00395699
Fas	1.61228	0.0222711
Tmco4	1.61445	0.0069354
Gimap6	1.61461	0.0277991
Gpr160	1.61486	0.0129367
Abcg3	1.61565	0.0452231
Fhod1	1.61818	0.004841
Parp12	1.6205	0.00216821
Gm33858	1.62149	0.0271859
Gdpd2	1.62202	0.0117127
Fn1	1.62377	0.00892043
Kctd11	1.62394	0.0114208
Smim24	1.62462	0.0381729
Scpep1	1.625	0.00501543
Scgb3a1	1.62523	0.00812859
Agpat2	1.62579	0.0136039
Sult6b1	1.6266	0.0436758
Ttf2	1.63026	0.0149901
Six1	1.6306	0.0456682
Tap2	1.63215	0.0076644
Upp1	1.63345	0.0113349
Prr11	1.63347	0.0177561
Gns	1.63502	0.00364113
Slfn3	1.63881	0.0429708
Cdk2	1.64131	0.00300754
Steap3	1.64408	0.0318939
Sgpl1	1.64444	0.0058086
Mob1a	1.64469	0.00367189
Plce1	1.64759	0.00594876
Samhd1	1.64837	0.00850089
Galnt3	1.64875	0.0126905
Ripor3	1.64897	0.0251302
Padi4	1.65064	0.00925722
Trim56	1.65159	0.000861786
Mmp14	1.65202	0.0135801
Tbx15	1.65365	0.00956043
Ankk1	1.65422	0.0187832
Slc2a4	1.6543	0.00306711
Tmc6	1.65481	0.00288196
Gm38843	1.65526	0.0240697
Ifnar2	1.65572	0.00333169
Socs3	1.65706	0.0163716
Mrc1	1.65749	0.00360795
Gm50012	1.65755	0.018878
Mvp	1.65806	0.00589886
Sowahc	1.65926	0.00278634
Trpm1	1.66055	0.0118803
Gm10134	1.66103	0.0333197
Gm5970	1.66242	0.0106575
Gtse1	1.66284	0.026362
Cyp4v3	1.66285	0.00709845
Dhrs3	1.66379	0.0139685
Adgb	1.66514	0.0282966
Snai1	1.66542	0.0213586
H1f4	1.66548	0.0251764
Cracr2b	1.66695	0.0015346
Htra3	1.6671	0.00384395
Serpinf1	1.66713	0.0174488
Scn11a	1.66922	0.0429132
Ccnb2	1.67221	0.0376389
Piezo1	1.67438	0.00469333
Vasp	1.67727	0.00344628
Olfm4	1.67851	0.0170729
Serpinh1	1.6786	0.0116653
Inka1	1.67902	0.00925722
Kntc1	1.68126	0.0370414
Eya2	1.68145	0.0141114
Bdh2	1.68153	0.0158789
Gm30329	1.6853	0.0326576
Galns	1.68838	0.00474965
Ucma	1.68848	0.0434307
Fmnl3	1.68865	0.00229483
Cryzl2	1.6887	0.00330886
Mdfi	1.69055	0.0231571
4933424M12Rik	1.6913	0.0475539
Tram2	1.69197	0.010736
Ighj4	1.69211	0.0177151
Wipf1	1.69219	0.00627501
Chaf1b	1.69291	0.0306777
Trim47	1.69389	0.004841
Pald1	1.69498	0.00404739
Ssc5d	1.6955	0.0224851
Syt15	1.69554	0.00350003
Gsap	1.69697	0.00474965
1700017B05Rik	1.69719	0.0027998
Phf11c	1.69786	0.0293242
Tspan8	1.69978	0.0423353
Rcn3	1.70079	0.00554922
Gm19935	1.70186	0.0185448
Ifitm6	1.70206	0.0167865
Itgb3	1.70257	0.00164656
Elf1	1.70377	0.00650595
Tk1	1.70433	0.016319
Tnfsf11	1.70499	0.00298916
P2ry12	1.7086	0.00216135
H4c11	1.71005	0.0300033
Micall2	1.711	0.00188186
Lefty1	1.71253	0.018878
Rps6ka1	1.71278	0.00514052
Tln1	1.7136	0.00558983
Spidr	1.71558	0.0163056
Mgp	1.71713	0.00664876
Gm15326	1.71747	0.0177681
Stat1	1.71861	0.00488691
Gm15964	1.71888	0.0144221
P2rx7	1.71924	0.00381493
Troap	1.71972	0.0251341
Casp1	1.72573	0.0118803
Zfp217	1.72686	0.00461839
Tmem176a	1.72906	0.00384395
Il15	1.73265	0.0145753
Lrmda	1.73278	0.0304941
Klra13-ps	1.73617	0.021332
A530064D06Rik	1.73703	0.00376244
H2ac8	1.7379	0.0100277
Sdf2l1	1.74172	0.00835207
Tfpi	1.74249	0.00242759
Cnn2	1.74434	0.0109645
Stat5a	1.74887	0.0336094
Sipa1	1.75011	0.00460361
Nfatc1	1.75304	0.00765184
F730311O21Rik	1.75355	0.0222301
Slc25a45	1.75395	0.00307806
Rapsn	1.75431	0.0134371
Ly6g5b	1.75523	0.0105784
Mxra8	1.75559	0.0123546
Kdelr3	1.75675	0.0460169
H4c8	1.75695	0.0308813
Fam180a	1.75767	0.00582423
Ehd4	1.75786	0.00232922
Cdca5	1.7601	0.0267136
Chst14	1.76071	0.0172752
Scamp2	1.76084	0.0043087
Dnase1l1	1.76139	0.0266998
Tmem26	1.76513	0.0435221
Gbp5	1.76564	0.0108072
Il16	1.76624	0.01229
Ciita	1.76805	0.0411347
Gpx3	1.76882	0.0296545
Lrch4	1.7701	0.0456417
Zfp993	1.77073	0.0437744
Adam17	1.77149	0.00305681
Enpp1	1.77193	0.0278937
Gm50048	1.77253	0.00499997
Fam187a	1.77267	0.0312286
Plk1	1.77315	0.0119532
Entpd1	1.77634	0.00345539
Mgl2	1.77821	0.030737
Slc45a3	1.77833	0.0202233
Hpgd	1.77922	0.00144601
Gm6548	1.78056	0.00902415
Mgmt	1.78164	0.0420943
Casp12	1.7841	0.00969679
Sh2d1b1	1.78424	0.0240767
Dennd2c	1.78706	0.0178022
Irak3	1.78736	0.018677
Ltbr	1.78851	0.0016947
AA467197	1.78867	0.028477
Dap	1.78876	0.0046153
Xaf1	1.78969	0.00426535
Col7a1	1.79025	0.0363661
Ldlrap1	1.79029	0.00751496
Gm34589	1.7922	0.0199146
Dhh	1.79353	0.0115189
Mgst1	1.79693	0.0071494
Fxyd5	1.798	0.00638817
Folr2	1.79803	0.0207402
Rgs10	1.79869	0.00194231
Gm38345	1.79994	0.00728658
Lmo2	1.80351	0.00239612
Tapbp	1.80367	0.00524479
Gimap9	1.80388	0.0352752
Slc17a9	1.80397	0.0174055
Ube2l6	1.80404	0.0136473
Sdc1	1.80434	0.0172449
F730035P03Rik	1.80562	0.00511023
Arap1	1.80582	0.004841
Ctla2b	1.80822	0.0238501
Ftl1	1.8086	0.00885186
Ccr9	1.81126	0.0289408
Lrrc39	1.81227	0.00924912
Fam167a	1.81333	0.00707925
Vamp8	1.81441	0.0037336
Tcim	1.81498	0.0271834
Creg1	1.815	0.00400374
Grap	1.81535	0.0046139
Procr	1.81731	0.047245
Parp10	1.81844	0.0038888
Rab27a	1.82245	0.000862213
Pctp	1.82319	0.00695444
Hsh2d	1.82341	0.0238501
Ptgdr	1.82473	0.0323338
2310001H17Rik	1.82558	0.0481507
Slc2a9	1.82689	0.0121842
1700058P15Rik	1.82998	0.00772814
Pmp22	1.83179	0.00305681
Plxdc2	1.83284	0.00185314
Rcsd1	1.83286	0.00715919
Mlkl	1.83554	0.0432595
Ighd	1.83896	0.0350602
Spns3	1.83929	0.00883956
Il18bp	1.84088	0.0363999
Slc29a3	1.84218	0.00376244
H2bc8	1.8424	0.0206379
Ccna2	1.84545	0.00924912
Sh3tc1	1.84606	0.00850799
Antxr2	1.84876	0.010286
Gata3	1.85035	0.0119294
Lhfpl2	1.85201	0.00414756
Gm37168	1.85239	0.0157846
Tpcn2	1.85362	0.00314105
Anpep	1.85365	0.030567
Clspn	1.85601	0.0272711
Trim21	1.86137	0.00495894
Myo1e	1.86241	0.0024887
Fbln1	1.86264	0.0146054
C030034L19Rik	1.8636	0.0082617
Abcb1b	1.86402	0.00221348
Kcnn4	1.86525	0.0488437
Dab2	1.86535	0.00333169
Trem1	1.86564	0.0119938
Gm36723	1.86957	0.0376389
Pimreg	1.87071	0.0208853
Mcemp1	1.87427	0.0159112
Edem1	1.87714	0.00284438
Nlrp1c-ps	1.87808	0.0163534
Slpi	1.87974	0.0272711
Mdfic	1.8799	0.0211955
Ifngr1	1.88027	0.00511023
Fli1	1.881	0.00745024
Dtx3l	1.88409	0.00454023
Icosl	1.88814	0.00251851
Mtarc1	1.88852	0.00664876
Lilra5	1.8905	0.0127439
Aebp1	1.89313	0.00161327
Tmem86a	1.8934	0.00995313
Elk3	1.89448	0.00573146
Tes	1.89453	0.00642908
Vsx1	1.89518	0.0127571
Dlgap5	1.89673	0.0247582
Mfsd7a	1.89767	0.0126905
Klk9	1.8978	0.00404739
C2	1.89826	0.0254998
Zfp683	1.8994	0.0396704
Blnk	1.90077	0.0102986
Klrc2	1.90163	0.0342194
Gm26542	1.90207	0.011232
Axl	1.90243	0.00213067
Slc26a7	1.90353	0.00315201
Gvin2	1.90839	0.0474282
Olfr99	1.90964	0.0253589
Gas2l3	1.91089	0.0133871
Cdkn2a	1.91229	0.0177737
Mylip	1.91239	0.0058086
Ptgs1	1.91307	0.00178096
Rhbdf2	1.91462	0.0180177
Atoh8	1.91658	0.0205543
Klre1	1.91767	0.0208141
Abhd15	1.91831	0.0044131
Rasgrp3	1.9202	0.00104911
Rassf4	1.92097	0.00980292
Igsf1	1.92132	0.0211336
Baiap2l2	1.92414	0.00169851
Bik	1.92431	0.0179349
Slc16a3	1.92889	0.00325184
Aspm	1.92986	0.0334681
Batf2	1.93041	0.0310117
Mfng	1.93118	0.00529203
Mymk	1.9333	0.0267357
Cd200r1	1.93869	0.0478763
Xcl1	1.93919	0.00120079
Chek2	1.93956	0.0172449
Gm42928	1.93988	0.0245819
Eda2r	1.94419	0.0249899
Slc1a5	1.94421	0.0206092
Ifitm2	1.94757	0.0263478
C130050O18Rik	1.94789	0.0192388
Spata13	1.94902	0.00175046
Esco2	1.94952	0.0219506
Gm12185	1.94985	0.0203743
Oas1b	1.95035	0.0312015
Ctsb	1.95105	0.00503322
Cenpf	1.95199	0.0129367
Nrros	1.95439	0.0081433
Cotl1	1.95448	0.00333169
Gbp8	1.95508	0.0280509
F13a1	1.95719	0.0101481
Gimap8	1.95897	0.0205438
Ftl1-ps1	1.95916	0.0136321
Gm44751	1.95936	0.00897018
Man2b2	1.96028	0.00166612
M1ap	1.96094	0.0207653
Arl5c	1.96226	0.0233926
Tep1	1.96351	0.00788899
Bgn	1.96584	0.0172449
Xlr4b	1.96605	0.0424835
Col5a3	1.96687	0.00511023
Pdgfrl	1.96703	0.0288947
Irgm1	1.96708	0.00447883
Ctsa	1.97547	0.00213067
Slc22a18	1.97588	0.0268552
C5ar2	1.97649	0.0119403
Glipr2	1.97785	0.0085015
Prrx2	1.98019	0.0229815
Samd9l	1.98204	0.00808074
Kif2c	1.98345	0.0411437
Gm26947	1.98743	0.00923627
Serpina3f	1.98879	0.0119403
Rab3il1	1.99183	0.00231632
H2-M3	1.99621	0.0135622
Jak3	2.00069	0.00233106
H2-T23	2.00106	0.00788899
Nid1	2.00384	0.0148893
Liph	2.00562	0.0064833
2610528A11Rik	2.00563	0.00921649
Pygl	2.00676	0.00235349
Pdpn	2.00945	0.00223279
Stk10	2.01208	0.00351467
Lipa	2.01238	0.00939977
Crispld2	2.01549	0.00256437
S1pr3	2.01581	0.00474965
Apol9a	2.01589	0.024662
Il13ra1	2.01851	0.00306711
Knl1	2.01856	0.039108
Irgm2	2.01933	0.0061908
AI467606	2.01968	0.0135043
Golm1	2.02079	0.00223889
Gm33699	2.02093	0.00993594
Trim25	2.02409	0.00239612
Pde3b	2.03117	0.00205103
Sctr	2.03736	0.0153848
Gm44860	2.03941	0.00989449
Abca9	2.04013	0.00284438
Klra2	2.04026	0.0387812
Ifi35	2.04127	0.0105952
Slc14a1	2.04248	0.00063737
Tor3a	2.04399	0.00229483
Myof	2.04562	0.0115477
Gm44250	2.04609	0.0104471
Cd63-ps	2.04947	0.00149103
Tagln2	2.04996	0.00267322
Gm26626	2.05274	0.0034331
P2ry10b	2.05303	0.0441457
Gm17147	2.05374	0.0125082
Prkcd	2.05687	0.00603274
Cbr2	2.05977	0.00544806
Ptgir	2.06014	0.00612149
Arhgap19	2.06127	0.00788082
Cep55	2.06239	0.0484682
Slc36a2	2.06448	0.0360868
Loxl1	2.06576	0.0129892
Mcm3	2.06874	0.0037778
Gm44861	2.06926	0.0119294
Cd63	2.07046	0.00220593
Tgtp2	2.0711	0.0335744
Gpr171	2.07289	0.0349591
Rnase6	2.0777	0.01618
Col4a5	2.0791	0.00812344
Xcr1	2.08179	0.0380599
Pnpla7	2.08399	0.000993831
E2f2	2.08737	0.0163534
Gmip	2.0874	0.000717451
Tnfrsf23	2.08878	0.00657038
Sparc	2.09029	0.000993831
Asf1b	2.09084	0.0119403
Pax5	2.09129	0.0406492
Irf9	2.09196	0.0018163
Naip3-ps1	2.09217	0.0163534
Neil3	2.09607	0.00544806
Apod	2.09643	0.00900716
Tlr9	2.09645	0.0118803
Stab1	2.0994	0.00903283
Il6ra	2.10101	0.00143372
Itpripl2	2.10203	0.00175046
2010008C14Rik	2.10289	0.0289981
Kcne1l	2.10391	0.00427577
Npl	2.10863	0.00284438
Lgmn	2.10906	0.0027012
Asap3	2.11012	0.00173309
Ccnb1	2.11098	0.0287707
Siglech	2.11176	0.000872347
Aspg	2.11177	0.00167604
Cd274	2.11306	0.00578886
Birc3	2.1137	0.0124708
Phldb3	2.11403	0.0131527
Knstrn	2.11836	0.0126905
6030468B19Rik	2.1191	0.0046139
Plcb2	2.12095	0.00333169
Guca1a	2.12263	0.0221153
P2ry13	2.12317	0.0015346
Lacc1	2.12458	0.00233106
Anxa4	2.12534	0.00454409
Gbp3	2.12669	0.00367325
Rhod	2.12744	0.0106815
Il1rl1	2.12763	0.0118803
E330020D12Rik	2.12813	0.0102997
Dna2	2.12867	0.0119294
Baz1a	2.12871	0.00420651
Zfp36	2.12882	0.00524049
Septin1	2.13059	0.0268748
Klra7	2.13183	0.0152865
Irak4	2.13188	0.00751745
Ckap2	2.1329	0.00390671
Parp3	2.13302	0.0018163
Tfec	2.13476	0.0263478
Hcst	2.13566	0.0222301
Tgfbr1	2.13717	0.00131505
Alox5	2.1375	0.010079
Csf1	2.13792	0.00107128
Ifit3b	2.14031	0.00461695
Col4a6	2.14409	0.018578
Col5a2	2.14471	0.00980292
Nfe2l2	2.14553	0.00223889
Mapkapk3	2.14609	0.00751496
Ifi47	2.14671	0.0167203
Selplg	2.14858	0.00114445
H4c17	2.15048	0.00388247
Dennd2d	2.15335	0.0264234
Def6	2.15406	0.00751496
Col15a1	2.15506	0.00511023
Zfp992	2.1553	0.00511023
Ly96	2.15624	0.00935466
Ccrl2	2.15752	0.0121644
Ms4a4d	2.16032	0.0461213
Gm20707	2.16253	0.0164516
Trim30c	2.16313	0.0118379
Igf1	2.16785	0.00722147
Gm38158	2.16832	0.0101964
Gna14	2.1687	0.00897018
Helz2	2.1696	0.00384718
Gbgt1	2.17096	0.0071494
Tigit	2.17694	0.0152813
Eif2ak2	2.17702	0.00223889
Ddx58	2.17896	0.00447883
Ebf3	2.18178	0.00642499
Tor4a	2.1821	0.00281448
Mafb	2.18568	0.00166612
Fgd2	2.18651	0.00103146
Espl1	2.18842	0.00588086
Cgas	2.18904	0.0116653
Ube2c	2.19009	0.0350711
Il10rb	2.19503	0.00309553
S100a11	2.19526	0.00460361
Il27ra	2.19668	0.0496681
Pik3r5	2.19712	0.00417521
Ndc80	2.19737	0.0071494
Lrrk1	2.1975	0.0036312
Mmp2	2.20212	0.00965129
9930111J21Rik1	2.20698	0.0211318
Serpinb1c	2.20762	0.00284425
Emilin1	2.20931	0.00925722
I830077J02Rik	2.21025	0.00341914
Srgn	2.21152	0.00351467
5830432E09Rik	2.21598	0.0206962
Ppp1r18	2.2169	0.0015346
B4galt1	2.21738	0.00307888
Gm4841	2.21857	0.00515085
Gm15635	2.21877	0.0092221
Tnfsf14	2.21919	0.00802373
Kynu	2.21941	0.0221207
Gm16464	2.22028	0.00996123
Zc3h12a	2.22466	0.0154739
Pbk	2.22475	0.0136093
Selp	2.22862	0.0214208
Cysltr1	2.23087	0.00989449
Gm15539	2.23093	0.00705966
Adap2os	2.23198	0.016367
Prdm6	2.24094	0.00420651
Ptger4	2.24102	0.0122191
Cmtm3	2.24238	0.00175046
D730005E14Rik	2.24325	0.0096575
Cp	2.24375	0.010812
Ly6i	2.24794	0.0220586
Rin3	2.24941	0.00663205
Gpr157	2.25725	0.00642908
Soat2	2.25743	0.0164128
Nuak2	2.26114	0.0181036
Nfkb2	2.26169	0.00409929
Card9	2.26173	0.00178096
Sucnr1	2.26364	0.0371139
Tec	2.26421	0.00284438
Gm12474	2.27017	0.0109728
Gm29291	2.27042	0.00667561
Tnfrsf26	2.27059	0.0339626
Zc3hav1	2.27274	0.00185314
Adap2	2.27632	0.0044131
AI506816	2.27669	0.00454023
Gm14321	2.27753	0.00952126
3830403N18Rik	2.2789	0.0377225
Ltc4s	2.28236	0.00621591
Lpcat2	2.28995	0.00174754
Cyp1b1	2.29109	0.0293242
Ebi3	2.29248	0.00679008
Tmem119	2.29526	0.00174754
Ctsl	2.29563	0.00166786
Scimp	2.29684	0.0126905
Bst1	2.30023	0.0414909
Rasa4	2.30179	0.00611073
Xdh	2.302	0.0108443
Adamts14	2.30699	0.00511023
Anxa1	2.30994	0.0181294
Unc13d	2.31045	0.00588086
Gm20559	2.31238	0.0129994
Clec4a3	2.31556	0.0131892
Casp8	2.3173	0.00454409
H19	2.31795	0.0482405
Arhgap27os3	2.3192	0.026856
Alox5ap	2.32177	0.0065419
Klrd1	2.32256	0.0420911
Iigp1	2.32371	0.00667561
Mamdc2	2.32445	0.00726356
Rubcnl	2.32627	0.00395581
Fasl	2.32843	0.0239625
Apol7e	2.32895	0.0481507
F11r	2.33188	0.00133249
Stx11	2.33766	0.0177151
Mmp27	2.34027	0.0494487
Hacd4	2.34125	0.004841
Gm5637	2.34691	0.0125409
Mx2	2.34703	0.0117404
Rinl	2.34775	0.0071494
Ncr1	2.34783	0.00446362
Tlr12	2.34826	0.00558983
Batf	2.34882	0.0265038
Emp3	2.34983	0.00627501
Clcf1	2.34997	0.00680127
Tns4	2.35077	0.0115477
Col18a1	2.35196	0.0182523
Ccdc88b	2.35212	0.00131505
Cd36	2.35288	0.0412682
Gm5086	2.35312	0.00503322
Haspin	2.35319	0.0305858
Tmem71	2.35602	0.0069354
Sh2d6	2.35784	0.0126905
Tnfrsf1a	2.35797	0.00179189
BC021767	2.35876	0.0482405
Itga5	2.36277	0.00474519
Cdca2	2.36418	0.0326442
Cd247	2.36461	0.030644
Il1rl2	2.36622	0.00315384
Klrb1b	2.36643	0.00578385
Gm13391	2.36911	0.0135622
Adamtsl3	2.37104	0.00581477
Ppic	2.37219	0.00330955
Gcnt1	2.37351	0.00544806
Adamts12	2.37703	0.0416932
Plscr2	2.37771	0.00902415
Il4ra	2.38002	0.00307806
Cryba4	2.38111	0.0081433
Gm15753	2.38216	0.0117127
Mrc2	2.38348	0.0015346
Npc2	2.3842	0.00143372
Klrb1c	2.38443	0.00949459
Nox4	2.38515	0.013295
Scara5	2.38516	0.0318181
Slfn5	2.38714	0.0044131
Pros1	2.38796	0.00174754
Apoe	2.39284	0.00558983
Kcnk6	2.3954	0.00174754
Il3ra	2.39618	0.00544806
Man2b1	2.40238	0.000872347
Lyz1	2.4032	0.0119403
Ikbke	2.40524	0.00621591
Trim12a	2.40774	0.002415
P4ha3	2.41007	0.00267422
Cfh	2.41042	0.00266759
Xlr4a	2.41671	0.0232382
AW112010	2.41938	0.0147639
Akna	2.42058	0.00131653
2010016I18Rik	2.42274	0.0418582
Ifi214	2.42425	0.0227903
Sp100	2.42503	0.00496734
Anxa2	2.42803	0.00213067
Col1a2	2.4305	0.0131054
Ccr5	2.43623	0.00296588
Tcn2	2.4366	0.000993361
Pon3	2.44436	0.00733932
Gm32591	2.44622	0.00232922
Lck	2.44699	0.0123546
Gbp2	2.45061	0.00642908
Cmah	2.45385	0.0474264
Tnfrsf13b	2.45943	0.0032388
Gm38317	2.45954	0.00455094
Gm42047	2.46037	0.0254998
Sting1	2.46116	0.00358015
Hhex	2.46289	0.00147915
Tgfbr2	2.46771	0.00186677
H2-DMb2	2.46832	0.0193661
Serpina3i	2.47009	0.00349481
Adam3	2.47262	0.011232
Ggta1	2.47482	0.000869262
Sell	2.47565	0.044361
Cd33	2.47833	0.000616342
Syngr2	2.47917	0.00205103
Kng2	2.47939	0.0455718
Adora3	2.48196	0.0118803
Slco2b1	2.48205	0.00141468
Tspan32	2.48238	0.0116276
Inpp5d	2.48742	0.00183057
Pglyrp2	2.4884	0.0164516
Calhm6	2.49359	0.0191172
Ppp1r3b	2.49463	0.000789277
Lbp	2.49566	0.0432597
Ccn5	2.4967	0.0493462
Ubash3a	2.49695	0.0286082
Glycam1	2.49868	0.0105784
Hlx	2.50171	0.00321463
Fam111a	2.504	0.0037336
Nlrp1a	2.50747	0.0117509
Trim5	2.51573	0.00588086
Dcn	2.51739	0.00396522
Susd3	2.51911	0.00989449
Dyrk4	2.52059	0.00582423
Lsp1	2.52216	0.00511023
4930517O19Rik	2.52663	0.00304572
Car13	2.52804	0.00534812
Traf1	2.52811	0.0147127
Clec4a1	2.52834	0.0211336
Cebpd	2.52904	0.00174754
Msn	2.53301	0.00178096
Aim2	2.5376	0.00143372
Lpar5	2.54003	0.0025053
Lyl1	2.54131	0.00142537
Gm2629	2.54373	0.00106971
Rnf213	2.54551	0.00306711
Cd19	2.54553	0.0446109
Arhgap4	2.54741	0.00229483
Adam8	2.54829	0.0174269
Clic1	2.54913	0.00228087
Maff	2.5513	0.0033043
Gpr174	2.55311	0.0333032
Trim12c	2.56014	0.00167604
Adcy7	2.56086	0.00233106
Vsir	2.56278	0.00143372
Hexa	2.56294	0.000809335
Bin2	2.56397	0.00169873
Lum	2.5646	0.0231571
Gvin-ps6	2.56892	0.0495628
Gmfg	2.57058	0.00245646
Cmtm7	2.57504	0.00256437
Cd69	2.57515	0.0200548
Slfn10-ps	2.57838	0.0071494
Trim34a	2.58202	0.0105464
Aurkb	2.58364	0.0214146
Rnase4	2.5897	0.000658387
Capn3	2.58971	0.000855625
Zfp268	2.59085	0.00568196
Ptpn22	2.59091	0.0138797
Nlrp1b	2.59427	0.00726288
Gzma	2.59545	0.0123291
Loxl2	2.59654	0.0224851
Ifit3	2.59848	0.000993361
Osgin1	2.59885	0.0151583
Mki67	2.60232	0.0181172
Ifitm1	2.60305	0.00506762
Tfpi2	2.60425	0.0119345
Tcirg1	2.60629	0.00151738
Hpn	2.60831	0.00197282
Rsad2	2.61257	0.0016947
Csf1r	2.61316	0.000767356
Slc7a7	2.61476	0.00342897
Cx3cr1	2.62659	0.000879009
Prf1	2.62704	0.00952126
Nlrc3	2.628	0.00667785
Apoc4	2.63249	0.0152776
Plxna4os1	2.63296	0.00808478
Naglu	2.63486	0.000728483
Renbp	2.63603	0.00106971
Gpr34	2.63879	0.000766762
Lpxn	2.64174	0.00198459
Tmem37	2.64189	0.0119938
Tnni2	2.64378	0.0098705
Plin2	2.64473	0.00664876
Gsdmd	2.64675	0.00328432
Acp5	2.64974	0.0405006
Mexis	2.65101	0.0212928
Bach2os	2.65228	0.00941454
Arhgdib	2.65245	0.00333169
Haao	2.65728	0.00626911
Tagap	2.65859	0.00355537
Il1b	2.66299	0.0135119
Syk	2.66318	0.00437916
Tspo	2.66527	0.00183057
Dok1	2.66599	0.00216135
Tmem156	2.67092	0.00642908
4930430E12Rik	2.67242	0.0424835
Plaur	2.67287	0.0024887
Cebpa	2.67783	0.000969683
S100a9	2.67814	0.0369462
Pycard	2.67984	0.00229483
Isg15	2.68245	0.00265746
Thbs1	2.68635	0.0131892
Ddx60	2.68812	0.00779651
Aoah	2.6995	0.0301887
Top2a	2.70027	0.00289417
Hpgds	2.71374	0.000729216
Itgb5	2.71684	0.000767356
Mlph	2.71984	0.00183057
Parp9	2.7249	0.00138504
Abca1	2.72659	0.00447675
Lair1	2.7282	0.00114502
Gpsm3	2.73251	0.00298916
Lrrc25	2.73554	0.011322
Ripk3	2.73654	0.00904015
Cybrd1	2.73954	0.000793298
Parvg	2.74	0.000869262
Cd79b	2.74043	0.0129039
C1s1	2.74317	0.0193061
Tnf	2.74877	0.0298773
Cd300a	2.75126	0.0212311
Hmox1	2.75472	0.00266782
Lpl	2.7556	0.00307337
Olr1	2.75626	0.00605215
Gm11545	2.76032	0.00346998
Emp1	2.76433	0.00765184
P2ry10	2.76684	0.0228765
Serping1	2.77505	0.011322
Rtp4	2.78415	0.00296588
Htr2b	2.7853	0.00330955
Tifab	2.78816	0.00143372
Ms4a6b	2.79031	0.014775
Cd9	2.7915	0.000728483
Cd96	2.79898	0.0134132
Psmb9	2.79938	0.00358015
Lyn	2.80663	0.00213067
Dnase2a	2.80917	0.00103146
Dhx58	2.81111	0.00544806
Ighv1-9	2.81206	0.0231571
Uba7	2.81285	0.00143372
Rhoh	2.81452	0.00238273
Arpc1b	2.81602	0.0011193
Chil3	2.8166	0.02396
Slco1a5	2.81895	0.00808478
Dennd1c	2.82229	0.00169851
Mlxipl	2.82637	0.000658387
Tgfbi	2.8342	0.00787004
Spint1	2.83493	0.00223889
Nfam1	2.83683	0.00178096
Aif1	2.83859	0.000766762
Ms4a14	2.84158	0.0105952
Frrs1	2.84605	0.00231632
Il1a	2.84979	0.00469539
Cd3e	2.85014	0.0269217
Ifitm3	2.85162	0.00217032
Tlr6	2.85298	0.00192559
C6	2.8589	0.0342395
Gdf15	2.85943	0.00808478
Tgif1	2.86298	0.00109128
Col1a1	2.86361	0.00799148
H2-Q4	2.86593	0.00217032
Mefv	2.87621	0.0332351
Plcg2	2.87675	0.000770572
Pilra	2.8772	0.00904614
Igsf6	2.8783	0.00680749
Tnfrsf14	2.88025	0.00707512
Pyroxd2	2.88033	0.000413775
Rbm47	2.88206	0.00788899
Ccr7	2.88325	0.0462832
A630001G21Rik	2.88355	0.00216135
Icam1	2.88386	0.00367811
Tmem221	2.88681	0.00733367
Anxa3	2.89128	0.000673322
Isg20	2.89161	0.00285361
AI662270	2.89656	0.0120662
Rab20	2.89672	0.00460361
Zmynd15	2.89695	0.0112704
Ptprcap	2.90616	0.0224795
Abcc3	2.91096	0.00419286
Zc3h12d	2.91145	0.00900716
Gbp10	2.92174	0.0106815
Pik3cg	2.93052	0.000910595
Gm43351	2.93113	0.00284438
Cyth4	2.93478	0.000879009
Fes	2.93717	0.000879009
Gzmb	2.93786	0.0124184
Unc93b1	2.93798	0.00131649
Osmr	2.93809	0.000490554
Tlr4	2.94058	0.00143372
Itgae	2.94871	0.00699725
Plau	2.95006	0.0011193
Dock8	2.95025	0.00103146
Themis	2.95077	0.0394571
Gpr35	2.95095	0.0211011
Itgal	2.95354	0.0225829
Il10ra	2.95552	0.00147915
Apobr	2.95977	0.00185314
Apobec3	2.96053	0.00216135
Ifi203	2.96066	0.00935466
Mndal	2.96806	0.0156863
Gm50035	2.96967	0.00447675
Ptafr	2.97136	0.00542771
Tnfrsf1b	2.97442	0.00361767
Itgam	2.97581	0.000809676
Lgals9	2.97605	0.0013831
Ms4a6d	2.97821	0.0139089
Wdfy4	2.97875	0.0015346
Olfr110	2.98071	0.00133249
Tap1	2.9831	0.00267322
Gm43197	2.98429	0.0123546
Gm12250	2.986	0.00892043
Xlr	2.98621	0.000734286
Mmp19	2.99761	0.00169851
Hck	3.00122	0.000993831
Ptpn18	3.00456	0.00167604
Osm	3.00615	0.00667561
Gngt2	3.01596	0.00377492
P2ry6	3.01703	0.00169851
Gpr132	3.02401	0.0365969
Ctsc	3.02693	0.00111661
Serpine1	3.0296	0.00217632
Pld4	3.03036	0.000658387
Pvrig	3.03074	0.00286803
Ctsh	3.03197	0.00123646
Trac	3.04065	0.0318301
Trbc1	3.04217	0.0309245
Klrk1	3.04329	0.018954
Gm26740	3.04441	0.00431053
Adgre1	3.05135	0.00106971
Irf5	3.05232	0.00165668
A430093F15Rik	3.05325	0.00284438
Iqgap3	3.05928	0.00107128
Tnfaip8l2	3.06297	0.0015346
Gpr183	3.06521	0.000778476
9930111J21Rik2	3.06812	0.000509784
Ifit1	3.06903	0.00106971
Serpinf2	3.07237	0.00175046
Tgfb1	3.07308	0.00103146
Cd101	3.07788	0.00345597
Parp14	3.08396	0.00123953
Hcls1	3.08561	0.00108991
Plbd1	3.08669	0.0447373
Apbb1ip	3.08894	0.000412329
Gbp6	3.0979	0.00239612
Ptpn7	3.09895	0.0235383
Nkg7	3.10097	0.0309245
Atp8b4	3.10831	0.031028
Pirb	3.11067	0.0277526
AU022793	3.11394	0.00333169
Ucp2	3.11448	0.00220593
Cmklr1	3.11491	0.00128109
Sh3bp2	3.11607	0.000658387
Gimap7	3.11753	0.0141114
Tmem154	3.1187	0.00274861
H2-DMb1	3.12074	0.00216135
Ptx3	3.12216	0.00956043
Clec5a	3.12511	0.0012501
Slc37a2	3.12596	0.000729216
Abi3	3.12602	0.000872347
Ncf2	3.12822	0.000767356
Nckap1l	3.14779	0.000743743
Hk2	3.15157	0.000434565
Olfml3	3.15312	0.000434565
Gusb	3.15322	0.000490526
Hmgb1-ps8	3.15351	0.00382879
BE692007	3.15951	0.0152776
Sash3	3.15964	0.00185314
Flnc	3.16391	0.000436364
Rab32	3.1675	0.00185314
Nrk	3.16845	0.0268073
Fermt3	3.17889	0.000775654
Cxcr4	3.18018	0.00256437
Trim30b	3.18348	0.00757948
Cdk1	3.19018	0.00417894
Slamf6	3.19344	0.00230776
Phf11d	3.19703	0.00245094
Fam167b	3.19944	0.0058086
Irag2	3.20148	0.000548334
Acod1	3.2025	0.0222521
Fcgr3	3.20919	0.000582586
Ikzf1	3.21141	0.00069272
Ticam2	3.21506	0.0058252
Ang	3.22018	0.000490554
Arhgap30	3.22029	0.00103146
Lcp1	3.22146	0.00173309
Timp1	3.2309	0.00808074
Spn	3.23175	0.0172706
Cd5	3.23877	0.00929213
Nlrp3	3.24592	0.00073433
Spi1	3.24608	0.000972732
Gna15	3.24634	0.00143372
Igkv6-15	3.25148	0.0464672
Was	3.25421	0.00217032
Fgl2	3.25673	0.000972732
Themis2	3.25959	0.0018163
Grn	3.26314	0.000434565
Traf3ip3	3.26539	0.000809335
Il21r	3.27083	0.00167604
Snx20	3.27431	0.000729216
Ccl11	3.27518	0.00171861
Cd109	3.27602	0.000673322
Hexb	3.27891	0.000434565
Myo1g	3.28477	0.0106152
Gm15880	3.28789	0.00073433
Lcp2	3.29144	0.00131505
Arhgap45	3.29553	0.000658387
Vim	3.29612	0.00114445
Rab7b	3.30056	0.00233106
Ifi44	3.30205	0.000434565
Tbxas1	3.30233	0.000673322
Ugt1a7c	3.3069	0.00185314
Vav1	3.31023	0.000993361
Slfn9	3.31492	0.00111727
Tlr8	3.32091	0.0221207
Tasl	3.32137	0.00216394
Tmem273	3.32788	0.00558983
Card11	3.33019	0.00835207
Cd86	3.33044	0.000729216
Slc39a4	3.34079	0.00341227
Sp110	3.34233	0.00247594
B2m	3.3437	0.000616342
Ifi208	3.34441	0.00304409
Cd3g	3.34712	0.0248919
Hpse	3.35074	0.00330886
Cd8b1	3.35109	0.0116653
Mcoln2	3.35453	0.0130964
Plek	3.35554	0.000412329
Cxcr6	3.362	0.0266032
Cd14	3.3625	0.000717451
Neurl3	3.36603	0.00233106
Cxcr3	3.37142	0.033296
Gvin-ps7	3.37577	0.00130712
Ikzf3	3.37693	0.0145656
Acap1	3.37951	0.0255112
Ulbp1	3.38418	0.00350003
Ctsw	3.38537	0.010963
BC147527	3.39344	0.00232922
Psmb8	3.39436	0.00131066
Elf4	3.40236	0.000982844
Ncf1	3.40246	0.000796111
Slamf8	3.40536	0.00620631
Ncf4	3.40637	0.00123908
H2-Ob	3.41204	0.00196404
Bcl3	3.41222	0.00217032
Usp18	3.4183	0.000399805
Casp4	3.41937	0.00103146
Rasal3	3.42056	0.000619767
Sh2d2a	3.42646	0.024662
Sros1	3.42866	0.00111727
Lat2	3.43106	0.00149103
Havcr2	3.43456	0.000399805
H2-K1	3.45139	0.000970017
Psd4	3.45634	0.00437916
Il2rb	3.46582	0.00568196
Sp140	3.46595	0.00106971
Tnfaip2	3.4661	0.00900716
Il18rap	3.47119	0.021503
Fblim1	3.47151	0.00106971
Gm10521	3.48316	0.00135922
Bcl2a1b	3.48671	0.00333169
Hk3	3.49695	0.000775654
Rac2	3.50012	0.00224691
9330175E14Rik	3.50807	0.00264777
Asb10	3.51046	0.0027012
Trim14	3.5147	0.00205103
Naip5	3.5184	0.000434565
Trim30d	3.52009	0.000412329
Runx1	3.52201	0.000969683
H2-D1	3.53454	0.000729216
Runx3	3.54175	0.00612149
H2-Oa	3.54257	0.000522941
Steap4	3.54328	0.0208141
Tlr13	3.54992	0.000775654
Klk6	3.56373	0.00370099
Laptm5	3.5649	0.000434565
Arhgap9	3.57502	0.00267322
Mcoln3	3.57779	0.017077
Ccl9	3.58102	0.000729216
Oasl2	3.58581	0.000846054
Fcrl1	3.58704	0.00307888
Btk	3.59535	0.00108991
Samsn1	3.59681	0.000399805
Slfn2	3.59853	0.00535986
C920009B18Rik	3.59965	0.00252854
Nlrc5	3.6026	0.0031536
Apobec1	3.61366	0.00274945
Cd53	3.6216	0.000399805
Pik3ap1	3.62343	0.000658387
Cd37	3.6254	0.000434565
Ms4a4c	3.6283	0.00789637
Ms4a7	3.63132	0.0145656
Ctsz	3.63168	0.000357888
Il2rg	3.63254	0.00267322
F830016B08Rik	3.63412	0.00396522
Mmp12	3.63784	0.0284293
Mmp13	3.64484	0.0332945
Fcrls	3.64497	0.000330527
Tlr7	3.64664	0.000658387
H2-Ab1	3.64764	0.0117127
AB124611	3.65241	0.013295
Fcgr1	3.6576	0.000734286
H2-Q5	3.65807	0.00197763
Ifi30	3.66423	0.00322577
Cd200r4	3.66525	0.00178096
Ccl12	3.66824	0.00145555
Dock2	3.67817	0.000434565
H2-Eb1	3.67892	0.021522
Cd300ld	3.69081	0.00927625
Stra6l	3.69209	0.0274478
Bst2	3.6937	0.000728483
C5ar1	3.69655	0.00389855
Wfdc17	3.70078	0.0109645
Glipr1	3.70998	0.00217632
Klhl6	3.71345	0.000314843
Cytip	3.72307	0.00925722
Cxcl16	3.7252	0.00231632
Oas2	3.73239	0.00109128
Bcl2a1a	3.73332	0.000673322
Il1rn	3.74046	0.0179418
Cxcl5	3.7408	0.0153601
B430306N03Rik	3.74172	0.00799148
Irf8	3.74496	0.000531779
Phf11a	3.74667	0.00185314
F9	3.74806	0.000993831
[truncated: 146 more rows]

## Sheet: DESeq2
Gene name	Log2FC	Padj
Gm14051	-5.1495	0.00325082
Gm37047	-4.83027	0.0451392
Gm48819	-4.3767	0.0287152
Gm44116	-4.35398	0.0317596
2310015D24Rik	-4.08463	0.0017281
Gm884	-4.04273	0.0340268
Gm12312	-3.8339	0.0417296
4930588K23Rik	-3.75712	0.0422106
Myod1	-3.63525	0.031404
Gm48530	-3.4068	0.0421505
Gm15870	-3.39367	0.0108432
Gm3279	-3.02195	0.00650529
Gm17853	-2.81493	0.0193623
Pus3	-2.77763	0.0107164
Theg	-2.72877	0.0407741
Gm29587	-2.72249	0.0178139
1700047F07Rik	-2.71908	0.0021773
4930578G10Rik	-2.67867	0.0229243
Prr32	-2.61552	0.0355085
Gm10334	-2.58377	0.0443321
Inhbe	-2.56772	0.0239862
Rcvrn	-2.54965	0.0264979
1700007P06Rik	-2.52973	0.0166914
Gm31946	-2.48532	0.0195055
Gm32939	-2.47036	0.0144155
Prss54	-2.46811	0.0443873
F630042J09Rik	-2.4609	0.00152142
Chrnb3	-2.42284	7.83631e-06
Gm12428	-2.42235	0.0171354
B530045E10Rik	-2.33362	0.0319459
Hjv	-2.31781	8.86479e-07
Gm11730	-2.30437	0.0358003
Xirp2	-2.26698	0.00574863
Gm49415	-2.26687	0.0294151
Erfe	-2.26326	9.45042e-05
Gm42743	-2.13813	0.00527446
Gm49932	-2.13346	4.93871e-05
Gm5105	-2.10815	0.0409108
Lct	-2.02774	3.50053e-05
Gm42813	-2.02607	0.0274428
Pnpla1	-2.02332	0.0364412
Gm47415	-1.9413	0.0118505
Gm13601	-1.93876	0.000722779
Myl4	-1.90229	3.35761e-07
Slc9a3	-1.89714	0.00931364
Gm31518	-1.88436	0.000124124
C730002L08Rik	-1.87686	1.13292e-10
Gm9946	-1.85729	0.00485877
Gm43684	-1.85661	0.00185287
Gm30648	-1.83708	0.000927806
Nxf7	-1.7889	0.00628463
Gm9924	-1.78437	0.00249002
Gm4724	-1.76386	0.0131542
Rpe65	-1.71651	0.000667803
F830208F22Rik	-1.71396	0.0356046
Gm17891	-1.70243	0.00180973
Myh1	-1.69951	0.00554735
Trpv6	-1.69836	0.000142844
Npc1l1	-1.68374	0.00144172
Gm20208	-1.68314	0.00132953
Gm765	-1.67831	0.032849
Taf7l	-1.66182	0.0415613
Plekhs1	-1.66	0.00143437
Ell3	-1.63512	0.0440145
Neurog2	-1.62722	0.0221038
Tectb	-1.62532	0.0112347
Olfr464	-1.61792	0.0251675
Neu2	-1.60975	7.28256e-06
5330416C01Rik	-1.59522	0.0140861
Npas4	-1.58876	0.00410621
Gm31218	-1.58217	0.0207821
Gm10570	-1.57813	0.0262029
H2-M6-ps	-1.57674	0.0185659
Jsrp1	-1.57377	8.53958e-06
Gm40518	-1.56652	0.00268721
Dalir	-1.55124	0.000166432
Marchf10	-1.53463	0.0105913
1700101I11Rik	-1.52536	0.00169962
Cpne9	-1.50916	6.67012e-05
Gipc3	-1.49653	0.000569675
AI115009	-1.49429	0.00133931
Arr3	-1.49181	0.0307409
Lamp5	-1.4848	4.57934e-06
Gm37266	-1.47462	0.0193957
Mylk3	-1.46439	3.56656e-06
Gm20628	-1.46114	0.00122978
Gm29674	-1.45152	0.000880218
Carlr	-1.45082	0.0080638
Adra1d	-1.44975	4.75805e-05
Gm48932	-1.42962	1.59713e-05
D030055H07Rik	-1.42583	0.00289457
9130024F11Rik	-1.41571	0.00121542
Gm35394	-1.41182	0.0110785
Tmem114	-1.40473	0.0226261
Ackr2	-1.39835	0.000933615
Sowahb	-1.39631	0.00041149
Gm45533	-1.38799	0.000771778
Spag6	-1.38418	0.00119099
Kcnk4	-1.3811	0.000557321
Ovol2	-1.36867	0.0414622
Gm26684	-1.36365	0.000355449
1700069B07Rik	-1.36145	0.0404152
Gm35161	-1.36074	5.05684e-05
Gm2464	-1.35765	0.00795064
Gm15688	-1.35643	0.00814892
Capn12	-1.35476	0.00322512
Gm17322	-1.35417	0.000419148
Wnt10a	-1.34546	0.00339376
NA	-1.34137	0.000724415
9330171B17Rik	-1.33671	0.0156105
Tnnc1	-1.32822	0.0228841
Gng13	-1.32378	0.00223536
Gm48957	-1.31816	6.63718e-08
Ndufb4c	-1.31619	0.0180123
Gm49300	-1.31513	0.0327336
Lrrc6	-1.31259	1.80077e-05
Gm14285	-1.31163	0.0252516
Rspo1	-1.30925	0.00332623
Atoh7	-1.30404	0.015796
Gm49731	-1.30353	0.00366251
Gm46633	-1.30127	0.00497774
Kcnab3	-1.29398	0.000102085
Gm49937	-1.29163	0.00466868
4921539H07Rik	-1.29156	0.0402664
Tgm3	-1.28642	0.00289077
Hkdc1	-1.28294	8.25461e-05
Diras2	-1.28123	5.2783e-05
Asb11	-1.28068	4.28479e-05
Alox12b	-1.2793	0.000455183
Ptprh	-1.27883	0.017264
Krt12	-1.27659	0.0156196
9130017K11Rik	-1.27454	0.0366582
1110032F04Rik	-1.26992	3.41915e-05
Adgrd1	-1.26788	4.36046e-05
Lemd1	-1.26717	1.45164e-07
Cabp1	-1.24789	3.49135e-05
Adra1b	-1.2452	0.000103712
Gm9899	-1.23383	0.000139377
Tph2	-1.22974	0.0316522
Cbln2	-1.22802	2.57374e-05
D930019O06Rik	-1.22712	0.000668141
Akr1c18	-1.22315	0.0479449
Gm34583	-1.22123	0.00574281
Gm44559	-1.22106	0.0456324
Fbxo47	-1.22079	0.032301
Gm11549	-1.22006	0.000287019
Kirrel2	-1.21971	2.53334e-06
Gm48992	-1.21744	0.0192207
Gm45809	-1.21646	0.0282911
Rgsl1	-1.20976	0.00416048
Pvalb	-1.20561	0.0164893
Aldh1a3	-1.19776	0.0440905
Rad51ap2	-1.19487	0.0393497
Gjd2	-1.19463	2.31703e-06
Gm48295	-1.19199	0.0311931
Mei1	-1.19161	0.00878864
Cck	-1.18756	0.000144605
Nrn1	-1.18454	0.00195227
9330121K16Rik	-1.18318	0.000364612
Tmem132d	-1.18249	9.64065e-05
Klhl40	-1.18216	0.000474873
Gm37824	-1.17992	0.00339376
AI593442	-1.17895	0.00100527
Hs3st2	-1.17866	0.000294302
Myh7b	-1.16897	0.00515252
Tmem196	-1.16481	5.8182e-06
Wnt9a	-1.16288	0.00166032
Exph5	-1.16101	0.000905409
Hcrtr1	-1.15888	0.00630576
Syt2	-1.15503	0.0155677
Gm15721	-1.15218	0.0205246
Nrgn	-1.15108	0.00168101
Gfra2	-1.14582	9.84673e-05
Kcnc3	-1.14553	0.000458817
Gm42433	-1.14522	0.00262644
AW495222	-1.14433	0.0317741
Gm37412	-1.14398	0.0102245
Kcnv1	-1.14131	0.00047476
A830009L08Rik	-1.14065	0.00219433
Pou6f2	-1.13904	0.0236491
Mypn	-1.13794	0.0159144
Hspa1l	-1.13776	0.000149262
Cabyr	-1.13707	0.00537279
Rgs4	-1.13453	0.00037429
Cckbr	-1.13141	0.00429643
Hapln4	-1.12904	0.00562654
Rph3a	-1.12526	0.000128171
Kcnh7	-1.1237	0.000303927
Ephb6	-1.11509	0.000824162
Catsperz	-1.11277	0.0481173
Mkx	-1.11013	0.000413187
Adcyap1	-1.10712	4.56393e-05
Gm37176	-1.10512	0.028532
Chrm3	-1.10487	0.00479825
Syndig1	-1.10365	1.00303e-05
Car10	-1.10304	0.00113707
Tbr1	-1.10173	0.00205737
Hipk4	-1.09988	0.00251923
Pak7	-1.09926	0.00465485
Efna5	-1.09561	0.000187815
Serinc2	-1.09539	0.000283594
Nptx2	-1.09362	0.000180364
Atp2b2	-1.09067	2.8102e-05
Gm42741	-1.08971	1.52949e-05
Rims3	-1.0878	0.000147988
3110053B16Rik	-1.08619	0.000249719
Satb2	-1.08479	0.0193469
Cadps2	-1.08408	0.00184148
Efcab6	-1.0837	0.000927806
Vxn	-1.08299	0.000683917
9030612E09Rik	-1.08275	0.00811353
Camk1g	-1.08014	0.000322053
Gm10654	-1.07928	0.0226261
Cort	-1.07849	0.0206185
Tmem215	-1.07783	0.0225137
Gucy2g	-1.07502	0.0005953
Gm28175	-1.07103	0.0184583
Snap25	-1.07008	0.00022879
Fhod3	-1.06791	0.00179488
Gm20063	-1.0677	0.0192054
Camk2n1	-1.06743	0.000341746
Epop	-1.06547	0.000587496
B230208B08Rik	-1.06435	0.0499643
Lpcat4	-1.06299	4.04838e-05
Gm34655	-1.05796	0.0251591
Gpr21	-1.05527	6.34806e-05
Gm2824	-1.0543	0.00213186
Mlip	-1.05363	0.00289028
Rtn4r	-1.05102	0.0187958
2600014E21Rik	-1.05076	0.0258168
C130074G19Rik	-1.04776	1.02017e-05
Cdh6	-1.04753	3.32064e-07
Kcns1	-1.04648	0.00148832
Rnf39	-1.0456	0.0103671
Emx1	-1.04361	0.00673993
Gm13446	-1.0432	0.0330332
Gm44284	-1.04174	0.0215368
Ccdc183	-1.04162	0.0443013
Kcnq5	-1.04126	2.09272e-05
Egr3	-1.04087	0.000907068
Mapk11	-1.0393	4.34347e-05
Gm37711	-1.03722	0.00012612
Stac2	-1.03649	0.000722533
Ramp3	-1.03608	0.0251096
Gm10118	-1.02806	0.00856534
Hecw2	-1.02801	0.00160173
Slc24a2	-1.02474	0.000121082
Kcng2	-1.02009	0.0107585
2700099C18Rik	-1.01998	5.62822e-05
Dact2	-1.01961	0.00244166
Rapgef4	-1.01929	0.000184912
Gm19410	-1.01836	0.00303783
Pkdrej	-1.01781	0.0251643
Vsnl1	-1.01545	0.00811698
Gm13629	-1.01522	0.0361726
Mal2	-1.01314	0.00495013
Htr2a	-1.01273	9.64992e-05
Ankrd34c	-1.01254	1.17321e-06
Frzb	-1.01108	1.59817e-08
1110002E22Rik	-1.01092	0.00102218
Fhl2	-1.01058	4.15659e-06
Golga7b	-1.00902	0.000476572
Sstr3	-1.00901	2.19583e-06
Fgf22	-1.00816	0.0121155
Brinp1	-1.00715	0.00157995
Necab3	-1.00531	5.30202e-05
Kcnk3	-1.00389	0.000330798
Camkk2	-1.00232	1.87208e-06
Gulp1	1.00016	0.00488632
Igfbp3	1.00028	0.00464558
Nrm	1.00113	0.0338354
Abcd1	1.00178	3.56622e-05
Lama2	1.00314	0.000519611
Dnm2	1.00393	0.000359706
Tmem198b	1.00402	0.00148813
Gfm2	1.00412	0.000153038
Hps4	1.00592	0.000244502
BC055324	1.00661	0.0192198
Shkbp1	1.00696	0.002502
Gpam	1.0086	2.83807e-08
Dnaic2	1.00978	0.01259
Sema4d	1.01095	0.000148165
Snx33	1.01138	0.000217758
P3h3	1.01152	0.00017415
Gm7730	1.01256	0.0492331
Slc10a7	1.01328	0.00349982
Slc38a6	1.01339	0.000227019
Kank2	1.01572	2.33847e-06
Gadl1	1.01622	0.017441
Cracr2a	1.01712	0.0042654
Acer2	1.01726	0.00156321
Pold4	1.01796	0.00101552
Reep3	1.01852	0.000114684
Abcg1	1.01869	0.00154281
H6pd	1.02038	0.00566985
Smtnl2	1.02093	0.0358515
Szrd1	1.02112	0.000136147
Itm2b	1.02112	4.05718e-05
Myoc	1.02225	3.0536e-05
Znrf2	1.02272	4.01434e-05
Hps5	1.02281	0.000108234
Mthfd2	1.02341	0.00333429
Mafk	1.02397	0.000356403
Smoc1	1.02405	5.76566e-06
Gba	1.02418	0.00119064
Wwtr1	1.02473	0.000670503
Acox3	1.02491	4.34571e-05
Frmd8	1.0258	0.000702117
Svil	1.02601	0.000904234
Snx5	1.0271	0.000142201
Thsd4	1.02748	0.00111194
Slc2a10	1.02882	0.00152388
St3gal6	1.02907	9.62379e-05
Tmem35b	1.0292	0.00447582
Alpk1	1.03009	0.000202518
Slc7a11	1.03119	3.35179e-05
Gm3325	1.03168	0.00225551
Bmp5	1.0317	0.00175132
Gm26902	1.03251	0.0120296
Lpcat3	1.034	1.66848e-05
Rplp0	1.03454	0.000294457
Fbln7	1.03542	0.00554735
Mif4gd	1.03549	0.00299306
Sft2d2	1.03611	5.17837e-05
Dok3	1.03612	0.0114382
Myo1c	1.03617	0.000500561
Galnt6	1.0363	0.00272776
Slc26a2	1.0363	0.000825486
Nucb1	1.03674	8.93075e-06
Pdlim2	1.03693	0.00393509
Lamc1	1.03745	2.14002e-06
Ly6a	1.03914	0.0188074
Mob3c	1.04127	0.00260516
Eif4ebp1	1.04139	0.00395023
Bche	1.04198	0.00236134
Socs1	1.04403	0.00786808
Plscr4	1.04407	0.000614981
Casp6	1.04416	0.00152785
Poc1b	1.04418	0.000830363
Nexn	1.04504	0.0076813
Capza1-ps1	1.04535	0.0380371
Slc41a3	1.04686	5.20221e-05
Slc16a12	1.04702	0.000989318
Cpne3	1.04799	0.000246226
Inpp4b	1.04834	0.000793216
Otulinl	1.04865	0.000163406
Ano6	1.04886	4.75934e-05
Gm49708	1.05031	0.0192054
Tlr3	1.05081	0.00018303
Creb3l1	1.05329	0.0110713
Dnd1	1.05399	0.0498825
Tfeb	1.0543	0.00227125
Lpp	1.05488	0.000320448
Prelp	1.05574	1.55268e-05
Ccnd1	1.05598	2.7619e-06
Fndc3b	1.05613	0.000221613
Fmo2	1.05673	0.000382454
Slc16a9	1.05923	0.00945913
Slc22a4	1.06075	0.000344145
Cyb561a3	1.06117	0.00299464
Cdc14a	1.0623	0.000929388
Kcne4	1.06469	0.0333546
Bmp6	1.06475	8.97932e-07
Pgd	1.0657	5.73401e-05
Nfkbia	1.06616	0.00110317
Gpr182	1.06635	0.00237049
Slc39a1	1.06642	3.28725e-05
Slc31a2	1.06759	0.00167648
Sugct	1.06792	1.36649e-05
Trp53inp1	1.06822	0.000671334
Mcl1	1.06941	8.21725e-05
Magt1	1.07037	0.000722779
Gja5	1.07068	0.0485576
Lrrn4cl	1.07105	0.0190819
P2ry14	1.07356	0.0416637
Btg1	1.07424	0.00117332
Pik3cd	1.07445	0.000585513
Serhl	1.07454	0.00330327
As3mt	1.07461	0.00114951
Nupr1	1.07504	0.0230675
Calhm2	1.07654	0.000529933
Slc13a3	1.07675	0.00183728
Atp6v0e	1.07694	0.000247169
Lrrc32	1.07696	0.00047351
Myo9b	1.07717	0.000164945
Ctdsp1	1.07809	1.63602e-07
Tmed3	1.07898	0.000208339
Eml3	1.07907	3.50371e-05
Slc16a6	1.07911	0.00338736
Sod3	1.0792	0.000809696
Sema3d	1.08046	0.000200128
Galnt7	1.08085	3.16955e-08
Tor1aip1	1.08089	4.25212e-05
Arhgef6	1.08248	0.00205035
Gm9795	1.08403	0.0436843
Rnf125	1.08411	0.00991709
3222401L13Rik	1.08434	0.000187448
Serp1	1.0853	0.000261364
Galnt10	1.08579	3.13721e-05
Sgk1	1.08603	0.000158939
Mtbp	1.08627	0.000239008
Resf1	1.08684	0.0003623
Npepl1	1.08769	7.94549e-05
Fat2	1.08832	0.0443321
Foxc1	1.0887	0.000607774
Naga	1.09156	4.54298e-05
Dpy19l4	1.09262	1.97099e-05
Rps27l	1.09335	0.00123915
Frmd4b	1.09551	0.000215658
Plagl2	1.09565	0.000158595
Fcgrt	1.09634	7.10104e-05
Gm19680	1.0978	0.0355672
Ednrb	1.09835	6.71684e-05
Gm16576	1.0999	0.00230884
Rp2	1.1005	0.000323086
Cks1b	1.10172	0.00873067
Mcm6	1.10234	4.5615e-05
Tnfsf10	1.10236	0.00105237
Arhgap24	1.10332	0.00183547
Spata3	1.10347	0.0227722
Gm9791	1.10361	0.0404469
2900089D17Rik	1.10384	0.0212245
Itpr2	1.10482	1.94289e-05
Mdk	1.10577	6.68835e-06
Pipox	1.10665	0.0328106
Prkd2	1.10732	0.0110248
Pdia4	1.10817	0.000986881
Tubb6	1.10849	0.00658485
C1qtnf1	1.10852	0.000485858
Flna	1.10856	6.53932e-05
Glb1l2	1.11028	0.0243088
Zfp953	1.11048	0.0228631
Brip1os	1.11076	0.000239465
Cyp27a1	1.11206	0.0174436
Lrig1	1.11245	1.24185e-09
Ephx1	1.11263	2.8102e-05
Stard9	1.11361	9.93276e-07
H2-K2	1.11393	0.00576094
Nedd1	1.11417	0.000643361
Arhgef40	1.11589	6.58299e-06
Creb3l2	1.1168	1.93291e-05
Mthfs	1.11822	0.00975488
Nxn	1.11922	2.09985e-05
Plcb3	1.1193	6.63022e-06
Kif18a	1.11997	0.0278536
Hif1a	1.12181	6.13983e-05
Tnfrsf11a	1.12288	0.00187583
Tpp1	1.12608	9.36419e-06
Dbi	1.12625	1.7791e-06
Tnxb	1.12638	2.88929e-07
Hoga1	1.12671	0.00912281
Aga	1.12695	0.000926177
Csk	1.12751	0.000894768
Spata6	1.12815	0.00684607
Crlf3	1.13121	1.56456e-05
Mov10	1.13146	3.17521e-05
Tmem104	1.13179	1.13203e-05
Lamb1	1.1318	5.11121e-05
Cep192	1.13434	3.20046e-06
Srebf1	1.13478	9.96565e-06
Slc16a1	1.13583	2.09272e-05
Snx9	1.13988	0.000260034
Capza1	1.14003	4.77169e-05
Mical1	1.14023	0.00212207
Manba	1.14069	0.000333863
A4galt	1.14162	0.003753
Padi2	1.14241	1.3814e-05
Smo	1.14263	1.0175e-06
Stat3	1.14314	3.81969e-06
Stat2	1.14342	9.11674e-05
Ttc12	1.14364	0.00198772
Chd7	1.14413	2.48718e-05
Cep85	1.14443	9.82642e-05
Aldh16a1	1.1458	0.000822468
Klhl38	1.14642	0.0409521
Lhcgr	1.14712	0.0445761
Ddx31	1.14968	2.49315e-05
Smpdl3b	1.15118	0.0212689
Zfp429	1.15143	0.0355945
Filip1l	1.15243	0.00614363
Pabpc1	1.15327	9.48055e-06
Islr	1.15448	0.00171945
Rbp1	1.15494	0.000132366
Ankrd13a	1.15559	2.06771e-05
Psme1	1.15661	2.43547e-06
Matn4	1.15769	0.000111546
Sulf1	1.1577	0.00217914
Snx18	1.15862	1.27784e-06
Zfp691	1.15877	0.00543527
Aox1	1.16004	2.01486e-08
H2bc6	1.16108	0.000212034
Cebpb	1.16135	0.000907574
Prdm9	1.16378	0.0025748
Cand2	1.16644	2.52985e-06
Mob3a	1.16673	0.00702052
Eef2kmt	1.16719	0.00613823
Pxn	1.16858	3.26168e-05
B3gnt3	1.17212	0.0342318
Gm17491	1.17269	0.00105022
2610203C22Rik	1.17289	1.62452e-05
Hcar1	1.17291	0.00173421
Pim1	1.17332	0.0495267
Id3	1.17591	6.53932e-05
Gpx8	1.17593	0.0109125
Ankrd44	1.17685	0.000110264
Fzd5	1.17717	0.000918227
Card19	1.17744	5.61436e-05
Slc25a24	1.1786	0.00994016
Prorsd1	1.17906	0.00021658
Fadd	1.17956	0.00239857
Ajuba	1.18025	0.00188541
St8sia6	1.18036	0.000114329
Cav1	1.18154	8.27175e-06
Vat1	1.18166	0.000124257
Cenpa	1.18177	0.0282947
Hdc	1.1825	0.0419798
Shisa5	1.18536	0.000437256
Adamtsl4	1.18666	0.000928358
Lims1	1.18674	6.29443e-07
Tnfaip8	1.18699	0.000218374
Ect2	1.1871	0.0258276
Cd82	1.1901	0.000125022
Adm	1.19132	0.00116583
4931440P22Rik	1.19192	0.00692575
Nectin4	1.19247	0.00222378
Kifc1	1.19282	0.00447228
Adrb2	1.19329	0.000180291
Col6a2	1.19391	6.81453e-08
H2-T22	1.19553	0.000128171
Txlnb	1.19653	1.2641e-05
Lamp1	1.1967	1.33972e-05
Cntrl	1.1969	3.77678e-06
Agtrap	1.19793	4.0512e-05
Ppp1r14b	1.19837	5.03424e-06
Tmem45a	1.20094	0.0156455
Kcnj2	1.20256	6.89035e-07
Serpinb9	1.20291	1.56456e-05
Itga11	1.20302	0.00175664
Gjb2	1.20348	5.84875e-05
Stard5	1.20479	0.00230472
Ip6k3	1.20505	0.000888769
Ticam1	1.20898	1.72278e-05
Ston1	1.20899	0.000500336
P2ry2	1.20938	0.0323799
Ednra	1.21157	2.06574e-06
Aldh1a1	1.21205	0.00129554
Ttc7	1.21224	0.000792789
Il6st	1.21274	3.13569e-06
St6gal1	1.21317	5.20221e-05
Zfp984	1.21431	0.00152867
Gm36908	1.21452	0.0356296
H3c15	1.21564	0.00714009
Sema3b	1.21591	0.00335983
Hspb1	1.21702	0.0160157
Cdkn2c	1.21776	0.0183788
Slc46a3	1.21858	0.000231066
Gltp	1.22181	0.000124377
Dpp7	1.22274	1.08832e-05
Slc7a2	1.22464	6.44993e-05
Uaca	1.22642	0.000212034
Foxj1	1.22889	0.000127465
Ggt5	1.22907	0.00144725
Ptgfr	1.22934	0.00248456
Fibin	1.23081	0.00125746
Pag1	1.23118	7.45266e-06
Plekho2	1.23245	0.00110499
Tns3	1.23261	2.20258e-05
Ggh	1.23321	0.000169448
Glmp	1.23467	9.97845e-06
Fkbp10	1.23513	5.80143e-05
Crybb1	1.23584	0.00443703
Pi16	1.23608	0.0115783
Fkbp7	1.23651	0.00289737
Lipo3	1.2367	5.74637e-06
Nek6	1.23701	1.45002e-06
Ehd2	1.23724	0.000333844
Lima1	1.23949	7.09697e-05
Itih5	1.23967	4.98664e-05
Fam102b	1.24343	3.16405e-06
Rbpjl	1.24362	0.0174031
Trf	1.24456	0.0117456
Abhd4	1.24505	7.58396e-08
Asah1	1.24509	3.94355e-05
Nagpa	1.24528	0.000419685
Rbpms	1.24641	7.23308e-06
Clec14a	1.24675	0.000388052
Cspg4	1.24733	1.09434e-07
Gm25047	1.24769	0.00201875
Plpp2	1.24988	0.00142158
Sned1	1.25082	1.24067e-05
Rhog	1.25215	0.000782068
Aldh3b1	1.2527	0.000136249
Plgrkt	1.25304	7.07199e-06
Fam114a1	1.25381	4.09136e-06
Tbx6	1.25418	0.0436258
Casp7	1.25449	0.000663404
Map3k1	1.25471	0.00367149
Zic4	1.25668	0.003365
Osr1	1.25671	0.00331901
Col13a1	1.25764	0.0202572
Tshr	1.25788	0.0320296
Ets1	1.25898	2.9946e-05
Acad12	1.259	0.0146213
Itpkb	1.25911	1.84071e-07
Atp7a	1.25921	0.000225316
Cd151	1.2624	1.9137e-06
Kirrel	1.26322	2.42269e-06
Agt	1.2642	0.00452681
Smc4	1.26545	5.38353e-05
Akap13	1.26564	5.88791e-05
Gm2a	1.26582	1.39672e-06
Bmp4	1.26653	0.000175576
Dram1	1.26848	0.0201429
Col16a1	1.26903	1.74558e-08
Rest	1.26942	0.000469678
Aox3	1.26951	0.00225391
Omd	1.26962	0.00870998
Cyfip1	1.27016	2.79341e-06
Tyms	1.27052	0.000906393
Pfkfb3	1.27166	0.000166426
Itgb1	1.2724	9.31346e-06
Dhrs1	1.27287	4.23881e-06
Gbp4	1.27339	0.00317196
Arhgap18	1.27422	3.18893e-06
Uap1l1	1.27649	5.60986e-05
Dkk2	1.27753	0.0203323
Bco2	1.27792	4.76842e-05
Rexo5	1.27811	0.0115194
Thbd	1.27821	1.99234e-06
Ap1g2	1.27829	0.000810021
Cfap97d2	1.27975	0.0110616
Vstm4	1.27991	0.000182165
Fxyd1	1.28241	7.87858e-06
Lamc3	1.28441	4.99637e-06
Adamts1	1.28509	9.8823e-05
Ptges	1.28575	0.000803903
Gm26797	1.28865	0.0141701
Slc47a1	1.28986	0.00141559
Tnfsf13	1.29228	0.0288937
Mavs	1.29273	8.54662e-05
Plekhf1	1.29327	0.00173834
Bach1	1.29383	6.88522e-05
Hs3st3b1	1.29441	0.0192216
Necap2	1.29612	7.96943e-05
Epb41l2	1.29621	7.40654e-07
Elovl1	1.29696	0.000231074
Rel	1.29871	0.00048204
Cenpl	1.30015	0.0016732
Eva1b	1.30089	0.00730303
Zfp607a	1.301	0.00228178
Vcam1	1.30116	6.28971e-05
Parp4	1.30121	0.0010829
Nfatc2	1.30214	0.000111651
Ccdc163	1.3029	0.00603542
Foxf1	1.30379	0.000163707
Colca2	1.30426	0.0345827
Lonrf3	1.3053	0.000255793
Ly6e	1.30719	0.000246293
Tm4sf1	1.30812	1.14357e-06
Nod1	1.30827	4.71165e-05
Prcp	1.30931	1.82728e-05
Ptbp3	1.30947	6.97414e-05
Tfcp2l1	1.31036	0.00601211
Lepr	1.31045	8.51342e-05
Fstl1	1.31054	2.8102e-05
Dera	1.31115	0.000877126
P2ry1	1.31162	0.00498075
Tirap	1.31206	0.00161757
Glb1	1.31215	6.62424e-06
Sh3pxd2b	1.31398	2.06975e-05
Thbs2	1.31436	0.00035838
Edem2	1.31593	5.7385e-05
Myb	1.316	0.0154113
Zap70	1.31731	0.00383194
Mapkapk2	1.31734	1.41094e-06
Glis3	1.31737	1.76243e-06
Fgd3	1.31867	0.00059618
Prrx1	1.31903	2.05767e-08
Lyve1	1.32127	0.032538
Maml2	1.32168	7.58454e-06
Angpt1	1.32176	4.03364e-05
H2-Q1	1.32183	0.00969826
Gstm2	1.32337	0.00665431
Bag3	1.32384	6.76549e-05
Hhat	1.32482	0.0150408
Haus4	1.32556	0.000583739
Spsb2	1.32684	0.00127626
Gm11772	1.32721	0.0310168
Mfsd1	1.32807	1.14722e-05
Igfbp7	1.32873	0.00191569
Nfatc4	1.32882	0.000122215
Naprt	1.33044	4.21518e-05
Ptbp1	1.33117	3.0385e-06
Cdiptos	1.33232	0.0207816
Hmmr	1.33272	0.0139194
Dchs2	1.33279	0.0126546
Stag3	1.334	0.0162018
Nat2	1.33425	0.00418411
Cox6b2	1.33514	0.0139034
Ccdc190	1.33549	6.64282e-06
Igf2	1.33739	0.0021298
Zfp36l2	1.33779	2.11694e-06
Cdca8	1.33856	0.0180089
Dnali1	1.33947	0.000653353
Castor1	1.3405	0.00232304
Tpx2	1.34074	0.00108373
Tead2	1.3409	6.87057e-06
Lrp10	1.34184	1.82785e-06
H2ac6	1.34191	0.0121557
Emilin2	1.34389	0.0188548
Mocos	1.34393	0.000412796
Slc22a2	1.34501	0.0179454
Cdca7l	1.34557	0.0478527
Plekhg2	1.35016	5.08958e-05
Foxm1	1.35041	0.00020767
Fuca1	1.35075	5.55608e-07
Tcaf2	1.35277	0.00280625
Gm38155	1.35428	0.00109846
Myc	1.35555	0.000306161
Plod3	1.35672	2.42378e-06
Scarf2	1.35821	1.21002e-05
Rarres2	1.35841	0.000947155
Kctd12	1.35892	3.3848e-06
Prkch	1.36049	0.00103199
Pnp	1.36074	0.000321856
Esyt1	1.36089	0.000451148
Gab3	1.36193	0.0141438
Myl12a	1.36209	5.58748e-05
Ddr2	1.36214	2.30056e-07
Snap23	1.36345	0.000132366
Apol10b	1.36424	0.0151692
Kcnk5	1.36803	0.0145303
Bicc1	1.37029	6.72331e-06
H4c9	1.37089	0.0418652
Slc2a5	1.37106	6.09829e-05
Sdc4	1.37149	3.77775e-06
Gypc	1.37205	0.00123249
Notch2	1.37285	2.72099e-06
Nr1h3	1.37436	2.67606e-05
Cdc20	1.37584	0.0209815
Cnn3	1.37601	3.04912e-07
Cln5	1.37634	8.44295e-06
Car5b	1.37672	7.62457e-06
Tmem252	1.37682	0.000274738
Tead3	1.37699	8.34448e-05
Rhoc	1.37703	1.07482e-05
Cdt1	1.37933	0.00052518
Cttnbp2nl	1.37965	4.00989e-07
Fam107b	1.38099	0.000259099
Twist1	1.38102	0.0275339
Rnf135	1.38102	0.000109575
Myzap	1.3812	0.00121658
Nt5dc1	1.38152	0.000523091
Stom	1.38161	4.05716e-07
P2rx1	1.38181	0.0248822
Exoc3l4	1.38317	0.0184401
Nbeal2	1.38321	5.59582e-06
Cfap43	1.38328	0.00187835
Pear1	1.38368	0.000187357
Gpr137b	1.3838	3.80805e-05
Nid2	1.38636	0.000697301
Gm2237	1.38667	0.0021298
Fmod	1.38762	2.2913e-09
Ighm	1.38876	0.00675103
Amz1	1.3903	2.50326e-06
Fam216b	1.39049	0.0234667
Pld1	1.39089	9.85432e-07
Cyp26b1	1.39182	0.0108467
Arap3	1.39429	4.01899e-06
Thbs4	1.39448	1.79665e-07
Cela1	1.39751	0.00040143
Prdx6	1.39928	1.8047e-06
Vkorc1	1.39975	0.000964176
Ccdc102a	1.40298	0.000120349
Crabp2	1.40323	3.14725e-05
Gm44667	1.40373	0.00956924
Selenop	1.40417	2.41006e-06
Fbxl13	1.40592	0.0233067
Hic1	1.40671	6.62138e-05
Shc1	1.41096	1.45309e-05
Nfkbiz	1.41103	6.1467e-05
Angptl2	1.41215	5.79461e-09
Tpbgl	1.41236	0.000784036
Cfp	1.41272	0.00604853
Snhg18	1.41359	9.42425e-05
Sinhcaf	1.41398	0.0323049
Galnt15	1.41508	1.35194e-07
Cped1	1.41583	1.84342e-05
Fmo5	1.41858	0.000176581
Tpm4	1.41858	4.18375e-06
Fnip2	1.42007	7.97987e-08
Adgre5	1.42065	0.00294039
Pqlc3	1.42384	0.00578883
Aldh1a2	1.42402	6.64565e-07
Fignl1	1.42489	0.0407108
Rab29	1.42726	0.000184344
Mertk	1.42762	1.73177e-06
Gch1	1.42953	0.0134014
Rrm2	1.42972	0.00218011
Lrrc3	1.43039	1.22024e-07
Lpin3	1.43073	0.00629648
Galm	1.43092	0.00340403
Eya4	1.43248	0.000147693
Wnt6	1.43395	0.00703657
Soat1	1.43593	5.74715e-07
Smim3	1.43768	0.000743011
Anxa5	1.43802	4.36389e-06
Myh9	1.43813	9.81154e-06
Serpine2	1.43861	4.09394e-08
Rgs22	1.43996	0.00597539
Plekhf2	1.44027	1.89764e-07
P3h2	1.44098	0.00017856
Sqor	1.44189	0.000611501
Ninj1	1.44373	0.000184892
Tbx18	1.4446	5.11121e-05
Nrp1	1.44602	1.36632e-05
Efemp2	1.44665	2.93362e-05
Mmp23	1.44725	0.0243409
Prg4	1.44745	6.59232e-07
Sh2b2	1.44894	0.000183203
Hspb6	1.44901	6.67781e-05
Serpind1	1.4504	1.0209e-05
Cst3	1.45141	1.57564e-08
Nuf2	1.45449	0.000330742
Zfp36l1	1.45479	1.49251e-07
Palld	1.45671	0.000149568
Heatr5a	1.45691	5.71502e-05
Gm41349	1.4571	0.0147907
Gxylt2	1.45805	2.12849e-05
Cutal	1.45821	0.0470532
Rftn1	1.46113	2.96371e-05
Fbn1	1.46162	0.000142883
Hspg2	1.46361	4.72506e-05
Cpq	1.46418	6.71095e-07
Pm20d1	1.46498	0.00138162
Foxd2	1.46571	0.033058
Lrp5	1.46642	1.5044e-06
Crtap	1.46745	9.93257e-05
Cln3	1.46803	9.02437e-07
Cdca3	1.46883	0.0336454
Col4a1	1.4689	3.52488e-05
Evi2a	1.46928	1.72903e-05
Slc5a7	1.47004	0.0200437
Dapp1	1.47165	3.21885e-07
Naalad2	1.47197	0.00395279
Ormdl2	1.47276	0.000295526
Tnfrsf13c	1.47306	0.0330224
Cubn	1.47315	0.00239982
Slc8b1	1.47328	4.23938e-05
Alx4	1.47964	0.00237548
Gpr179	1.48019	0.0438609
Acss3	1.4814	0.00961427
Plscr1	1.48143	0.00103199
Gem	1.48158	0.00013035
Tifa	1.48384	0.000313987
Acads	1.48503	1.77181e-07
Znf41-ps	1.48539	0.000121841
Neat1	1.48785	4.19443e-06
Lamp2	1.4883	5.19046e-07
Map3k14	1.48873	1.72022e-05
Tnfaip3	1.48879	1.01749e-06
Rin2	1.48942	1.60126e-08
Galnt4	1.4898	1.04874e-06
Vav2	1.49324	2.55486e-05
Rhoj	1.49437	8.63588e-05
Hmgb2	1.49571	9.56679e-05
Cenpi	1.49689	0.019714
Slc10a3	1.49767	0.00280501
Bcl2l11	1.49867	0.000179988
Tax1bp3	1.50054	4.98664e-05
Gm6545	1.50105	0.00117695
Pdlim4	1.50188	3.02642e-08
Pla2g4a	1.50209	0.000166749
Meox1	1.50311	0.007817
Nphs2	1.5032	0.0257276
Tent5a	1.5076	6.81936e-06
Fgfbp1	1.50886	0.000386519
Zfhx3	1.50974	9.22409e-08
Nmi	1.51006	0.000171377
B3gnt5	1.51022	0.00122822
Rec114	1.51125	0.0173828
Gm45838	1.51131	0.0124625
Pou2f2	1.51245	1.75112e-08
Skap2	1.51274	1.69885e-06
Acpp	1.5128	0.0171229
Mr1	1.5139	6.53635e-06
Dock11	1.51567	1.53755e-06
Foxd1	1.51632	0.000270538
Gm15708	1.51677	0.0409489
Cdh1	1.52017	6.86025e-10
Orai1	1.52021	2.15945e-06
Pbxip1	1.52153	4.75562e-08
Ptgr1	1.52172	0.0434268
Gpr137b-ps	1.52284	7.54912e-06
H1f2	1.52343	9.02152e-07
Arhgap17	1.52379	2.40137e-07
4930556M19Rik	1.52431	0.0364526
Nsl1	1.52477	0.00111589
Nt5dc2	1.52555	6.34806e-05
H2-T10	1.52633	0.0020616
Ccdc170	1.52779	0.00696117
Lama1	1.52783	6.08618e-05
P2rx4	1.53071	0.00103809
Itga6	1.53087	1.9158e-06
Trpm6	1.53349	0.00368688
Fgf2	1.53352	4.93438e-06
Jpt2	1.53379	0.000128923
Arsi	1.53383	0.0031367
Fabp7	1.53412	9.57283e-05
Tspan4	1.53421	1.39528e-08
Dcxr	1.5351	0.000244437
Pcolce	1.5366	1.72903e-05
Clec10a	1.53702	0.00680106
Fzd7	1.5372	5.27489e-07
Gdpd2	1.53721	0.000182086
Ifi27	1.53767	8.5558e-12
BC064078	1.53993	0.00067696
Rcbtb2	1.54188	6.94378e-07
Tnfsf12	1.54193	0.000986929
Sall3	1.54274	0.000410086
Adamts9	1.54744	4.54379e-05
Gpc2	1.54791	0.00629648
Tal1	1.54809	7.46772e-05
Vamp5	1.54942	0.000176096
H2-DMa	1.54951	4.3593e-08
Dynlt1f	1.55308	0.000620619
Fam129a	1.55501	0.000398692
Wasf2	1.55716	3.70451e-07
Galnt12	1.55759	0.00134195
Pxdc1	1.56159	2.11757e-06
Tmem123	1.5632	2.89925e-05
Lpo	1.56434	0.00196414
Kif11	1.56579	0.00130299
Gm11992	1.56665	0.000141079
Cflar	1.56679	7.2172e-07
Vwa5a	1.56786	1.3312e-07
Tmem140	1.56833	0.0316463
Spdl1	1.57057	0.000313987
H2-T24	1.57178	2.55764e-07
Has2	1.57203	0.0109913
Ddx11	1.57214	0.000519967
Pla2g15	1.57273	1.16681e-08
Anxa9	1.57301	0.00592687
Plekhg6	1.57608	0.0401176
Lif	1.58118	0.00699196
Ppl	1.58242	0.000426678
Angptl4	1.58428	0.00846551
Foxc2	1.58431	4.55065e-05
Card6	1.58548	6.94849e-05
Ckap2l	1.58763	0.00178041
Iqgap1	1.58859	5.00189e-05
4930455G09Rik	1.59019	0.0257898
Cmtm6	1.59094	2.23681e-08
Ildr1	1.59281	0.00690125
Six3	1.59333	0.0421587
Gm10384	1.59349	0.0334234
Slc43a1	1.59468	0.0370731
Wdr62	1.59518	0.000276478
Csf2ra	1.59804	1.62799e-06
Rab39	1.59886	3.93604e-05
Gm20743	1.5992	0.00149532
Clec2d	1.5996	0.000679143
Tmem176b	1.5997	1.13116e-06
Zbtb42	1.60014	0.0433981
Igfbp5	1.60452	3.92124e-10
Loxl3	1.60583	3.58475e-06
Gm10790	1.60713	2.12081e-07
Arrdc4	1.60748	3.2751e-07
Cd80	1.60854	9.85079e-05
Pstpip1	1.61074	0.00552316
Gbp7	1.61112	1.30307e-06
Itih2	1.61378	0.000332647
Nrap	1.61476	0.00121785
Dse	1.61476	4.96752e-05
Ncaph	1.61485	0.000549245
Mmp11	1.61857	0.000421573
Igtp	1.62194	0.000254718
S1pr2	1.62197	0.0018762
Ifit2	1.62433	6.87151e-07
Txnip	1.62512	5.57046e-06
Klk8	1.62517	0.000885162
Rbm38	1.62552	0.000103989
Clec1a	1.62562	0.00175174
Col27a1	1.62578	3.60656e-09
Gm31718	1.62741	0.034459
Phyhd1	1.62836	1.26969e-05
Reep4	1.6284	0.000235186
Hfe	1.6316	0.000915085
Rrbp1	1.63197	2.79099e-07
Myct1	1.63257	0.0001634
Ahnak	1.63491	1.70372e-07
Lpar6	1.63524	2.49968e-06
Ogn	1.63801	4.62539e-07
Cenpe	1.63858	0.000142393
Hspb8	1.63921	3.16579e-06
Aoc3	1.64006	0.00667882
Gbp9	1.64263	0.000104824
Akr1b8	1.64409	0.00117332
Map4k1	1.64435	0.00147577
4930523C07Rik	1.6444	1.90562e-05
Aqp4	1.64644	9.81246e-08
Ostf1	1.64654	1.88721e-07
Six2	1.64703	0.00047298
Aldh1l2	1.64708	3.77069e-06
Lgals1	1.65003	3.0124e-05
Litaf	1.65053	1.67765e-05
Ddx43	1.65219	0.0399343
Nfkb1	1.65312	1.95819e-07
Igsf10	1.65329	1.97752e-07
Gm49702	1.65507	0.0197592
Igfbp2	1.65649	1.27903e-05
Itpripl1	1.65729	0.00165911
Gng5	1.65734	3.34259e-09
Rflna	1.65832	0.00339969
Cd83	1.65889	7.4953e-07
Cd93	1.65948	0.000283245
Sfrp5	1.66025	0.0254583
Erap1	1.66067	6.14506e-07
Sbno2	1.66121	8.3614e-08
E230029C05Rik	1.66124	1.56113e-05
Mrgprf	1.66331	0.00106897
Cpxm1	1.66386	7.45765e-05
BC028528	1.66519	0.0114382
Gm45650	1.66727	0.0497417
Stat6	1.6683	3.89194e-06
Cdk6	1.6686	6.34018e-08
Sall1	1.66895	6.89666e-06
Il1r1	1.67032	1.03865e-05
Ifi203-ps	1.6707	0.0427682
NA	1.67214	0.00343476
Plod1	1.67325	3.01879e-06
Tnfsf13b	1.67396	3.33251e-06
Trib3	1.67437	0.00354274
Gm49599	1.67448	0.00260693
Efemp1	1.67621	2.96734e-07
Olfm4	1.67832	0.000887732
S100a6	1.67868	6.26831e-06
Vwf	1.68007	2.32119e-08
Smagp	1.68061	5.96189e-05
Relb	1.68176	8.34964e-05
Rbl1	1.68197	5.73143e-05
Cd4	1.68468	0.00328044
Uhrf1	1.68739	0.000502414
Sat1	1.6881	1.8384e-08
Crybg1	1.68862	0.00436084
Col6a3	1.68876	1.42628e-05
Arhgap25	1.69003	8.03525e-07
Lpar2	1.69171	0.000185346
Gm16580	1.69199	0.0412368
Cnmd	1.69363	0.0117305
Sla	1.69376	1.14898e-05
Serpinb6b	1.69433	3.67464e-05
Adamts7	1.69492	0.00371201
Vrk2	1.69512	1.54773e-05
Pacc1	1.69799	1.67569e-09
Plin4	1.69809	0.000608309
Parp12	1.69929	5.79461e-09
Arhgap11a	1.69985	1.90782e-07
Tnfsfm13	1.69991	0.0337464
Gldn	1.70099	3.82406e-05
Map3k8	1.70146	4.09016e-05
BC035044	1.70278	6.91403e-05
Plxnb2	1.70398	4.67277e-08
Bmp2k	1.7061	2.73877e-08
Myd88	1.70764	3.26168e-05
Plce1	1.7078	2.66762e-06
Ripk1	1.70912	2.49968e-06
Psme2b	1.71032	2.21621e-06
Ifih1	1.71064	8.9347e-06
Tgm2	1.71299	2.12819e-05
Zfp991	1.71345	2.09272e-05
Bmf	1.7138	5.11179e-06
Trim56	1.71448	2.8123e-12
S1pr4	1.71684	0.026191
Dnajb13	1.71717	0.0259741
Colec12	1.72327	8.82858e-06
Ror1	1.7261	0.00187024
Igsf1	1.72714	0.0033807
Slc16a10	1.72831	0.000200278
Slc12a7	1.729	7.40654e-07
Car9	1.72991	0.0392712
Cdk2	1.73023	2.70265e-08
Ctla2a	1.73043	0.0025748
Lrp2	1.73247	0.0347784
Gm17092	1.73286	0.0390373
Irf1	1.73483	4.15577e-06
Gm48552	1.73594	0.0422851
Ephx3	1.73662	0.00611652
Kmo	1.73847	0.0337967
Chad	1.73906	0.0455926
Svep1	1.74004	0.000142401
Scpep1	1.74238	1.91982e-07
Vnn1	1.74243	0.0463532
Syt15	1.74386	8.26331e-08
Gns	1.74551	1.992e-08
Gm26280	1.74707	0.0154758
4930565N06Rik	1.75065	0.0188114
Fhod1	1.75095	3.06708e-07
Ssc5d	1.75104	0.000828763
Mob1a	1.75126	1.82554e-08
Prdm1	1.75172	0.000884878
Kif20b	1.75207	0.00091988
Sowahc	1.7533	6.81082e-09
Pla2g2d	1.75363	0.00176055
Ecm1	1.75512	6.62138e-05
Fn1	1.75694	6.67867e-07
Htra3	1.7593	1.1659e-07
Gimap1	1.76065	0.00173098
Ecscr	1.76629	3.52488e-05
Tmc6	1.76636	6.22111e-08
Tmco4	1.76638	2.44685e-06
Fhl3	1.76784	0.000858924
Slc2a4	1.76996	1.17361e-08
Sfrp4	1.77141	0.0353956
Cracr2b	1.7729	7.03914e-11
Mxd3	1.77304	0.000979397
Mrc1	1.77316	5.22235e-08
Upp1	1.77364	1.73395e-05
Ifnar2	1.77402	4.09439e-08
Smim24	1.77506	0.013659
Sgpl1	1.7754	1.60478e-07
Fam180a	1.77862	2.33556e-06
Gimap5	1.7815	0.00892749
Nfkbie	1.78532	0.000825929
Eya2	1.78534	6.52394e-05
Vasp	1.78632	1.38241e-08
Mir17hg	1.7866	0.00195449
Tap2	1.78685	2.31899e-06
Tbc1d10c	1.7878	0.0215116
Mvp	1.78975	4.64103e-07
Fmnl3	1.79138	2.63928e-09
Tspan8	1.79162	0.0214914
Cryzl2	1.79191	6.77e-08
Itgb3	1.79307	8.00681e-10
Kctd11	1.79352	1.62083e-05
P2ry12	1.79529	1.66697e-09
Adam12	1.79554	9.06529e-05
Gpr160	1.79904	3.83103e-05
Piezo1	1.80088	1.4983e-07
Mmp14	1.80103	1.03439e-05
Adgb	1.80167	0.00159876
Piezo2	1.80259	0.00197813
Epha2	1.80628	0.0020397
Chst14	1.80688	0.000204091
Galns	1.80733	3.59187e-07
Cyp4v3	1.80919	7.21851e-07
1700017B05Rik	1.80992	1.29642e-08
Samhd1	1.81181	1.47766e-06
Gm28286	1.81238	0.023794
Trim47	1.8159	1.43116e-07
Pald1	1.81607	1.17194e-07
Galnt3	1.81621	7.35333e-05
Sytl4	1.82115	0.000183999
Adh1	1.82309	0.0118512
Bnc2	1.82356	0.0119823
Micall2	1.82364	1.85734e-09
B3gnt7	1.824	0.00012809
Slc45a3	1.82432	0.000268691
Tbx15	1.82518	7.87858e-06
Wipf1	1.82537	2.63537e-07
P2rx7	1.82658	4.70699e-08
Gsap	1.82731	2.52846e-07
Tram2	1.82941	1.57859e-05
Ncapg	1.82991	0.0238155
Chil1	1.83135	0.00244166
C1rl	1.83181	0.0253733
Foxd2os	1.83486	0.0264239
Fam169b	1.83576	0.000144605
Rcn3	1.8372	7.04223e-07
Angpt2	1.83808	0.000286419
Mgp	1.84028	4.16835e-07
4833411C07Rik	1.8439	0.00875633
Gm19710	1.84602	0.027003
Prr33	1.84662	0.00748549
Gm19935	1.84725	0.000292141
Serpinh1	1.84846	2.50268e-06
Rps6ka1	1.84901	9.30815e-08
Inka1	1.84999	1.19845e-05
Tln1	1.85206	7.62937e-08
Agpat2	1.85309	5.46632e-05
Gimap6	1.85481	0.000278932
Elf1	1.85482	2.96734e-07
Tmem176a	1.85534	2.21815e-08
Bdh2	1.86	8.48454e-05
Ttf2	1.86117	6.92497e-05
Gm16118	1.86222	0.0480039
Tfpi	1.86232	3.77078e-09
Rrad	1.86252	0.000594131
Zfp217	1.86517	1.80203e-07
Gm42778	1.86601	0.00455514
Ehd4	1.86648	1.92171e-09
Stat1	1.86741	1.43087e-07
Sdf2l1	1.8692	5.24879e-06
Daw1	1.87071	0.0262345
Tk1	1.87133	0.000121082
Spidr	1.87143	8.97045e-05
Dhrs3	1.87293	9.47367e-06
Fas	1.87352	0.000104128
Hpgd	1.87532	1.9158e-10
Chaf1b	1.87814	0.00261612
Slc25a45	1.88811	3.44918e-08
Serpinf1	1.88879	2.85758e-05
Sipa1	1.88906	9.6433e-08
Stat5a	1.88929	0.00116863
Scamp2	1.89011	3.71643e-08
Ripor3	1.89112	0.000659835
Adam17	1.89138	5.12912e-09
Ltbr	1.89289	1.60376e-10
Socs3	1.89386	4.09159e-05
A830008E24Rik	1.89718	0.0112516
Gm20605	1.89921	0.0184401
C530044C16Rik	1.90097	0.0185733
Steap3	1.90293	0.00012895
Rgs10	1.90306	6.75257e-10
Il12rb1	1.90352	0.0130129
Rab27a	1.90388	4.68912e-12
Pi15	1.90479	0.0114023
Entpd1	1.90753	1.32589e-08
1810034E14Rik	1.91276	0.00387138
Kntc1	1.9131	0.00270542
Lmo2	1.91329	8.34208e-10
Snai1	1.91482	0.00030728
Cnn2	1.91613	2.4603e-06
Dusp27	1.91617	8.51342e-05
Prr11	1.91772	0.000161533
Xaf1	1.92004	1.93109e-07
Plxdc2	1.9214	3.77771e-10
Dap	1.92327	1.05407e-07
Abcg3	1.92514	0.00568832
Casp12	1.92576	1.06462e-05
Nfatc1	1.92602	1.14223e-06
Ldlrap1	1.92723	8.11241e-07
Pmp22	1.9281	2.84143e-09
Dnaaf3	1.92972	0.00303125
Il31ra	1.93067	0.0104989
Mxra8	1.93386	3.57353e-06
Gbp5	1.93419	8.73235e-06
H1f4	1.93425	0.00047351
Ccnb2	1.93599	0.00247704
Gm6548	1.94819	5.14158e-06
Tapbp	1.95054	4.97798e-08
1810073O08Rik	1.9506	0.0164105
Arap1	1.95262	2.67548e-08
Creg1	1.95273	1.08216e-08
Slc26a7	1.95317	2.35826e-08
Slc16a3	1.95392	1.35261e-08
Casp1	1.95413	1.32441e-05
Birc5	1.95444	0.00255474
Mgl2	1.95563	0.0166174
Vamp8	1.95858	2.22877e-08
Gm16499	1.95924	0.00358509
Mgst1	1.96032	4.38284e-07
Fxyd5	1.96035	3.21885e-07
Dennd2c	1.96059	0.000169739
Gins2	1.96638	0.0104695
Icosl	1.96669	8.04804e-09
H4c8	1.97072	0.00348679
Nek5	1.97357	0.0151644
Myo1e	1.97392	1.05266e-09
Parp10	1.97417	7.14711e-08
Enpp1	1.97555	0.000110559
Antxr2	1.97606	1.02921e-05
Mmp9	1.97839	0.00217914
Grap	1.97906	2.09023e-07
Ube2l6	1.97947	2.11101e-05
Slc29a3	1.98701	1.17361e-08
Gm50048	1.98714	2.45603e-07
Aebp1	1.98837	5.74854e-12
Pdgfrl	1.99032	0.00269034
Echdc3	1.9914	0.000856666
Tes	1.99165	3.48842e-06
Ftl1	1.99186	2.96734e-07
Lrrc39	1.99198	1.18098e-05
Lhfpl2	1.99272	1.82031e-08
Kdelr3	1.99316	0.010443
Fam167a	1.99346	1.43123e-06
Il15	1.99691	5.04632e-05
Dab2	1.9998	7.51787e-09
Abcb1b	2.00228	3.15359e-09
Rcsd1	2.00624	4.14952e-07
Il16	2.00681	9.00533e-06
Chat	2.00799	0.0164334
Axl	2.00968	9.96533e-11
Ropn1l	2.01032	0.000714735
Rasgrp3	2.01088	2.43386e-12
Col7a1	2.01184	0.000567565
Edem1	2.01185	2.43199e-09
Tpcn2	2.0122	2.00501e-08
Isl1	2.0195	0.0163134
Clec4n	2.02158	0.0268687
Slc25a43	2.02287	0.0121084
Pctp	2.02339	2.57854e-06
Irak3	2.02418	7.35915e-05
Slc2a9	2.02667	1.6835e-05
Trim21	2.02718	2.33241e-07
Gm37168	2.02903	0.000130796
Srpx	2.0296	0.0344815
Itga2	2.03148	0.0107231
Atoh8	2.03152	0.000525512
Cd27	2.03175	0.0305137
Dtx3l	2.03238	5.71309e-08
Elk3	2.03423	1.69616e-07
Ptgs1	2.03534	3.27526e-10
Ccna2	2.03666	5.27698e-06
Gpx3	2.03668	0.000147693
Blnk	2.03772	3.66334e-06
Ager	2.03788	0.0236878
Plk1	2.03873	2.19574e-05
Ifngr1	2.04131	4.67277e-08
Prrx2	2.04183	0.000634638
Baiap2l2	2.04908	2.54114e-10
Gm33858	2.05066	0.000970164
Pclaf	2.05204	0.00176643
Dnase1l1	2.05216	0.00017415
Rapsn	2.05256	9.26005e-05
Procr	2.05456	0.00532236
Spata13	2.05506	1.0542e-10
Gtse1	2.05715	0.000569809
Spon2	2.0606	0.00573295
Lefty1	2.06539	0.000193127
Gas2l3	2.06951	2.57869e-05
C2	2.06956	0.00135019
Cd38	2.07148	0.000440188
Sh3tc1	2.07155	2.4603e-06
Mgmt	2.07182	0.00230884
Mdfi	2.0746	0.000430608
Ccdc69	2.07578	0.0152393
Man2b2	2.07847	5.60606e-11
Nlrp1c-ps	2.07877	0.000393844
Gm43196	2.08022	0.0315918
Slc17a9	2.0831	0.000230928
Phf11c	2.0867	0.00191318
Mylip	2.08966	6.78458e-08
E2f8	2.08982	0.0112381
Fgf7	2.09287	0.0225842
Cotl1	2.09591	9.28815e-10
Fli1	2.09789	5.48642e-07
Gm30329	2.09819	0.00176933
Ctsb	2.09847	5.16343e-09
Ctsa	2.10322	7.6772e-11
Inmt	2.10396	0.0067931
Gm44250	2.10754	2.61774e-05
Tmem86a	2.10774	7.07117e-07
Rassf4	2.10899	6.82219e-07
Mfng	2.10956	1.23461e-07
Gm10134	2.11386	0.0019068
Sdc1	2.11422	2.51368e-05
Ccr9	2.117	0.00557668
Clec9a	2.11967	0.00617626
Ntrk1	2.12042	0.0261078
Fbln1	2.12202	3.11778e-06
Tex11	2.12317	0.00546829
Clspn	2.12394	0.000643452
H2bc8	2.12533	0.00047298
Il13ra1	2.12713	4.65203e-09
Slc35d2	2.12882	0.00241103
Prkcd	2.13034	7.05581e-07
Slc14a1	2.13251	2.50708e-15
Rab3il1	2.1331	3.59855e-10
Pdpn	2.13425	1.36922e-09
Tcim	2.13515	0.000251836
Ercc6l	2.13653	0.0367189
Irgm1	2.13835	1.47917e-08
Pygl	2.14062	3.90878e-09
Gm15964	2.14271	0.000263131
Gm11131	2.14489	0.00117219
Samd9l	2.14664	8.03525e-07
Depdc1a	2.14791	0.0152113
Cd63-ps	2.1481	5.6403e-11
Jak3	2.15174	1.14438e-09
Ucma	2.15385	0.0174034
Spc25	2.15777	0.00145971
Golm1	2.15922	4.24055e-10
Tep1	2.15963	3.42205e-07
Lrmda	2.16059	0.00183547
Trpm1	2.16132	0.000426651
Gm50012	2.16543	0.000889131
Brip1	2.16548	0.0211107
Ptgdr	2.16999	0.000695964
Cenpf	2.17139	2.27811e-05
Nrros	2.17211	2.76871e-07
Trim25	2.17683	6.0414e-10
Col5a3	2.17695	3.2751e-07
Pde3b	2.17726	2.93661e-10
Pimreg	2.1779	0.00058701
Mdfic	2.17827	1.40843e-05
Stk10	2.18034	4.13028e-09
NA	2.18092	0.0236147
Tor3a	2.18133	4.01472e-10
Gm34280	2.18153	0.0372596
Sparc	2.18174	5.41679e-14
Crispld2	2.18293	3.57908e-09
Six1	2.18461	0.0028851
Gm8369	2.18496	0.0477034
Liph	2.18854	5.67168e-07
Pnpla7	2.18912	5.26346e-13
Gm6583	2.18933	0.0287923
Irgm2	2.18987	1.23713e-07
Gmip	2.19032	1.63974e-14
Abca9	2.19039	1.14438e-09
Kif2c	2.19227	0.0214716
Mrap	2.19469	0.00568829
Tagln2	2.195	4.40447e-10
H2-T23	2.19573	1.69976e-07
Jaml	2.19865	0.00944849
Glipr2	2.19908	6.85918e-07
Cd63	2.20079	4.09179e-11
S1pr3	2.20269	1.34235e-08
Il18bp	2.20727	0.000182993
Gm26947	2.20822	5.86689e-06
F13a1	2.20829	1.93031e-06
Abhd15	2.21094	1.998e-07
Rhbdf2	2.21569	1.54814e-05
Tnni3	2.22033	0.0102597
Gm28417	2.2209	0.0199818
Aspg	2.22312	7.09092e-11
Il6ra	2.22714	6.5013e-11
Siglech	2.22779	4.00726e-13
Ftl1-ps1	2.22988	1.30769e-05
Slc1a5	2.23451	2.57783e-05
Anpep	2.23693	4.71165e-05
Irf9	2.23878	8.62986e-11
Ciita	2.24007	0.000419685
Itpripl2	2.2414	2.71465e-11
Mcm3	2.24292	2.05508e-08
Bgn	2.24428	2.38686e-06
Csf1	2.24773	6.2019e-14
Lipa	2.25143	2.02003e-07
Asap3	2.25309	3.89895e-11
Tgfbr1	2.25522	4.21058e-13
Parp3	2.25532	1.45073e-10
P2ry13	2.25611	5.18379e-11
Arl5c	2.25662	5.60015e-05
Ifit3b	2.2584	5.42133e-08
Gm34589	2.25945	0.000471272
Kcnn4	2.26332	0.0031377
Kcne1l	2.26409	4.57423e-08
Lgmn	2.26418	1.9183e-10
Mfsd7a	2.26475	1.13691e-05
Npl	2.26506	1.00606e-08
Spns3	2.26594	2.57589e-05
Irak4	2.26919	2.04293e-06
Lacc1	2.26949	5.13609e-10
H2-M3	2.26998	3.37958e-06
Selplg	2.27082	1.32373e-12
G530011O06Rik	2.27442	0.000631867
Cd200r1	2.27636	0.0018955
Ano7	2.27783	0.0110064
Gimap8	2.28339	7.53122e-05
C5ar2	2.28432	1.40508e-05
Nid1	2.28968	1.22695e-06
Arhgap19	2.2927	2.1044e-07
Knstrn	2.29307	7.13453e-05
Gbp3	2.29562	3.63183e-09
Nfe2l2	2.29676	2.55133e-11
Ifitm2	2.30504	7.59319e-05
Ifi35	2.30973	5.88134e-06
Zfp36	2.31276	7.27439e-08
Smpd5	2.31292	0.00331433
Myof	2.31376	6.39649e-07
Baz1a	2.31385	3.84034e-08
Plcb2	2.31586	3.77078e-09
Tlr9	2.31794	3.40566e-06
Fgd2	2.31876	4.27774e-13
Cpz	2.31895	0.0478511
AI467606	2.31989	1.57151e-05
Mafb	2.32156	5.08852e-12
Angptl3	2.32173	0.0117923
Gm41611	2.32196	0.0195269
Col4a5	2.32267	1.14426e-07
Apod	2.32819	9.10039e-08
Chek2	2.33125	2.25784e-05
Cd226	2.33563	0.00970452
Mlkl	2.33596	0.00167648
Ticrr	2.34245	0.00658718
Anxa4	2.34313	2.05221e-08
Col15a1	2.34329	5.27619e-09
Gpr18	2.35302	0.0448044
Eif2ak2	2.35384	2.34526e-10
Ebf3	2.35448	4.42923e-07
Postn	2.35517	0.000229065
Cgas	2.35601	1.40508e-05
Pla1a	2.35616	0.00178676
Cd274	2.35704	5.0691e-08
Stab1	2.35704	1.07147e-07
F630028O10Rik	2.35911	0.0350801
Serpinb6c	2.3625	0.0194611
Espl1	2.36276	3.78626e-07
Dok2	2.36337	0.00595969
Loxl1	2.36836	7.80799e-07
Ppp1r18	2.37058	1.32662e-11
Slfn3	2.37271	0.0035192
Lrrk1	2.37461	1.66984e-09
Helz2	2.37727	1.16311e-08
Oas1b	2.37838	0.000355449
Serpina3g	2.3845	0.0146922
Tor4a	2.38598	2.74641e-09
Gm15635	2.3884	4.09184e-05
Cbr2	2.38957	3.60151e-07
Il10rb	2.38973	1.44769e-09
Gbgt1	2.39059	7.53978e-07
Dlgap5	2.39097	0.00141957
Cdca5	2.39162	0.00121431
Cmtm3	2.39247	2.50562e-11
Pla2g4c	2.39306	0.0387957
Ckap2	2.39441	2.43025e-08
Gm17147	2.39697	3.25017e-05
B4galt1	2.39905	4.35611e-10
Ddx58	2.39976	1.39919e-08
Aspm	2.39987	0.000448057
4930447K03Rik	2.403	0.0184803
Mapkapk3	2.40404	2.60272e-07
Prelid2	2.40424	0.0291467
Itk	2.405	0.00634637
Igf1	2.40568	4.20415e-08
Ighd	2.40823	0.000413187
AA467197	2.40858	0.0112274
Slc10a4	2.40917	0.0064136
Pik3r5	2.40982	8.2391e-09
Sctr	2.41269	0.000499875
Card9	2.41352	8.67968e-11
Srgn	2.41487	1.05816e-09
Gm44861	2.42062	1.16736e-05
Mgst2	2.42301	0.0466704
Gm4070	2.4238	0.00119064
4933424M12Rik	2.42469	0.0189982
Eda2r	2.43082	0.000251836
Zfp992	2.43225	1.94839e-07
Col5a2	2.43427	2.00623e-07
E2f2	2.43754	1.24856e-05
I830077J02Rik	2.43987	1.08879e-08
Zc3hav1	2.44026	3.68209e-11
Ccnb1	2.44057	0.000642184
Birc3	2.44116	2.49928e-06
Ctsl	2.44201	6.02558e-13
Dna2	2.44222	3.48483e-06
Ccr1	2.44256	0.0117655
2310001H17Rik	2.44636	0.0102703
Gm15326	2.44662	0.00363159
Zfp993	2.44714	0.0165822
Tnfrsf23	2.44904	1.93031e-06
C130050O18Rik	2.44916	0.000215926
Lpcat2	2.44925	1.02626e-11
Gm49703	2.45086	0.0438555
S100a11	2.45174	1.47917e-08
Tec	2.45417	2.24777e-09
AI506816	2.45574	2.62502e-08
Emilin1	2.45705	4.57303e-07
Mymk	2.45772	0.00275805
Lilra5	2.46174	0.000137353
Def6	2.46312	4.17553e-07
Gm38843	2.46343	0.0223642
Mmp2	2.46582	3.08019e-07
Rubcnl	2.46826	2.84859e-08
Sgo1	2.47074	0.0376197
Vsx1	2.47614	0.0004552
Tmem119	2.47893	3.41573e-11
Il1rl1	2.47935	1.69064e-05
A430057M04Rik	2.48551	0.00975122
Tlr12	2.48764	2.59688e-07
Slpi	2.4885	0.000523415
Cysltr1	2.48855	6.22493e-06
F11r	2.49118	1.24697e-12
Xlr4b	2.49132	0.0333309
Gpr157	2.49219	8.43489e-08
Mrc2	2.49317	2.90455e-12
Ahnak2	2.49585	2.41582e-09
Nfkb2	2.49779	2.96692e-09
Iigp1	2.49976	1.91982e-07
Adamtsl3	2.50005	4.67277e-08
Gm38158	2.50135	7.47676e-06
Ccrl2	2.50389	4.8597e-06
Rin3	2.50653	9.50108e-08
Mybph	2.50709	0.00583441
Apof	2.50733	0.0406217
Col4a6	2.50814	5.79728e-06
Gm1070	2.50879	0.00512043
Il2ra	2.50934	0.0371238
Mamdc2	2.51205	3.90664e-07
Gimap9	2.51444	0.000918571
Ccdc88b	2.51895	7.17566e-13
Hcst	2.52143	0.000375822
Alox5	2.52261	4.36726e-06
Tnfrsf1a	2.52814	2.40627e-12
Adap2	2.53028	8.28955e-09
Ly96	2.53274	8.46879e-06
Man2b1	2.53278	2.63138e-15
Septin1	2.53327	0.000171626
Rnase6	2.53943	0.000155226
Hacd4	2.54074	1.00846e-08
Fam187a	2.54163	0.0179198
Npc2	2.54243	3.11276e-13
Phf11	2.54609	0.0407147
Rasa4	2.5498	1.83087e-08
Kif18b	2.55055	0.0120711
Slc22a18	2.55153	0.000484809
Gm33699	2.55226	2.6321e-05
Ifi47	2.55256	9.35702e-06
Pros1	2.55414	2.17059e-12
Mir155hg	2.55578	0.0356637
Gbp8	2.55654	0.000469091
Prdm6	2.5587	8.66561e-08
Cp	2.56098	9.60808e-08
Casp8	2.56112	1.17062e-08
Bub1	2.564	0.00870818
Gm44860	2.56718	2.67094e-05
Plscr2	2.56734	2.29313e-06
Zc3h12a	2.57537	7.53207e-06
Ebi3	2.57737	9.43855e-07
Cd36	2.57737	0.0149549
Ankk1	2.57858	0.00388442
Tcn2	2.5789	3.57927e-14
Clec4a3	2.57958	1.96912e-05
Ltc4s	2.58592	1.97373e-07
Kcnk6	2.58971	2.0054e-11
Ptger4	2.59003	1.09562e-06
Clcf1	2.59128	5.19046e-07
Ggta1	2.59642	1.44036e-14
Trim12a	2.59742	2.54222e-10
Itga5	2.59776	2.95307e-09
Tns4	2.59845	1.28218e-05
Unc13d	2.60027	3.40552e-07
Cd33	2.60049	2.35468e-17
Cfh	2.60133	7.7782e-12
Mx2	2.60568	5.13278e-06
Apoe	2.60596	5.0478e-11
Evi2	2.60722	0.00904921
Akna	2.60771	1.98243e-12
Slfn5	2.60906	5.12912e-09
Anxa2	2.61213	7.01414e-12
Il4ra	2.61291	4.41285e-10
Xdh	2.614	2.30985e-07
P4ha3	2.61672	1.02288e-10
Tgtp2	2.6207	0.00011579
Rinl	2.62092	2.62765e-07
Tnfrsf13b	2.62121	9.05136e-09
Gm42928	2.6244	0.000542749
Slco2b1	2.62924	3.64612e-13
Asf1b	2.63125	1.81142e-05
Ppic	2.63142	2.05592e-09
Ppp1r3b	2.63334	2.54383e-14
Apol9b	2.63489	0.0102377
Ccr5	2.63611	2.69848e-10
Gcnt1	2.63681	5.99313e-08
Esco2	2.63705	0.000510359
Alox5ap	2.63931	1.83267e-07
Rab19	2.64024	0.0113472
Ccl22	2.64175	0.00585318
Il1rl2	2.65408	1.17877e-09
Tgfbr2	2.65458	2.55749e-12
Gzmk	2.65745	0.0240884
Ifitm6	2.66598	0.00211334
Syngr2	2.6668	1.64798e-11
Sp100	2.66944	9.60873e-09
Rhod	2.67095	5.88134e-06
Tmem71	2.67237	1.06222e-06
Inpp5d	2.67469	2.9618e-12
Btla	2.67521	0.0118688
Emp3	2.67651	3.46352e-08
Gm20559	2.68167	1.75337e-06
Fut4	2.683	0.00316288
Hhex	2.68308	1.01916e-11
Fam111a	2.68468	4.89597e-09
Bcl2l14	2.68692	0.0251913
Cebpd	2.68706	2.87788e-12
Gm12185	2.68923	0.000482636
Gm128	2.69454	0.0209743
Gm5086	2.70003	4.50366e-08
Troap	2.7019	0.00281152
Grap2	2.70316	0.000674614
9930111J21Rik1	2.70521	1.48922e-05
Hexa	2.70939	5.378e-16
Maff	2.7105	1.69748e-08
Mcemp1	2.71318	0.000649199
Slc36a2	2.71359	0.000293606
Sting1	2.71384	2.02583e-09
Pon3	2.71432	6.7476e-08
Dennd2d	2.7187	0.000297697
Olfr56	2.72047	0.0437181
Il3ra	2.72736	3.22937e-08
Msn	2.72874	7.44068e-13
Clic1	2.7297	3.92987e-11
Rnase4	2.73076	8.7773e-17
Dcn	2.73151	9.48626e-10
Ikbke	2.73196	4.16194e-08
Aim2	2.73255	3.79569e-12
C1ra	2.73258	0.0125173
Vsir	2.73491	2.07995e-13
Ube2c	2.73492	0.00112698
5830432E09Rik	2.73592	0.000467662
Anxa1	2.73664	4.48458e-06
Col18a1	2.73755	4.23664e-07
Nuak2	2.74088	4.77322e-06
Pbk	2.74249	3.94235e-05
Cep55	2.74272	0.00339376
Gm2629	2.74396	3.4349e-13
Lsp1	2.74427	1.38954e-08
Gm5637	2.74755	6.45519e-05
Adora3	2.74924	5.68653e-06
Rsad2	2.75151	4.15518e-11
Csf1r	2.75154	1.10055e-16
Pou2af1	2.7516	0.022548
Lyl1	2.75164	5.88389e-12
Gbp2	2.75961	1.3679e-08
Trim12c	2.75972	4.61594e-12
Ifit3	2.76185	2.34932e-14
Col1a2	2.76431	4.38709e-05
Il27ra	2.77255	0.00521348
Capn3	2.77286	2.44935e-14
Cx3cr1	2.78023	9.97414e-16
Naglu	2.78068	1.04975e-16
Batf2	2.78165	0.00201494
Car13	2.78345	2.23521e-08
Bin2	2.7848	3.95568e-12
Stx11	2.78631	5.06126e-05
Cyp1b1	2.78694	0.000582269
Pax5	2.78752	0.010618
Tcirg1	2.78841	1.27315e-13
Gpr34	2.78942	8.99882e-16
Adcy7	2.79022	5.86765e-12
Ptgir	2.79209	2.45783e-05
Cybrd1	2.79704	4.64377e-14
Rnf213	2.79787	4.97352e-11
Il7r	2.7999	0.000863794
Knl1	2.80835	0.00032668
Hlx	2.8095	1.70567e-09
1700058P15Rik	2.81168	0.00098902
Arhgap4	2.81256	1.53926e-10
P2ry10b	2.82029	0.00111726
Tspo	2.82435	1.22866e-11
Soat2	2.82511	0.000186775
Cmtm7	2.82571	2.44787e-10
Gm36723	2.82887	0.00614363
Arhgdib	2.82935	6.04218e-10
Gm46224	2.83134	0.028199
Gm13391	2.83348	4.24462e-05
Neil3	2.83573	3.75483e-05
Cryba4	2.83682	3.01738e-06
Cebpa	2.83988	9.93818e-16
Renbp	2.84309	1.48451e-13
Ccr6	2.85044	0.0367189
Adgre4	2.85389	0.0367189
Tagap	2.86731	4.87158e-09
Hpgds	2.8679	3.16124e-17
Lpar5	2.86926	1.44769e-09
Nlrp1b	2.86935	4.92279e-07
2610528A11Rik	2.87256	0.000202083
Gsdmd	2.87417	4.01472e-10
Loxl4	2.87446	0.025114
Itgb5	2.87706	7.61441e-17
H4c3	2.87858	0.0144377
Gm42047	2.88763	0.00120825
Folr2	2.88833	0.00152271
Trim5	2.88963	9.65137e-08
Lck	2.89447	3.80219e-06
Trim34a	2.89663	1.71272e-06
Susd3	2.89917	3.34234e-07
Pycard	2.90587	1.13595e-10
Gvin1	2.90677	0.000708011
Adap2os	2.90688	4.0512e-05
Srp54b	2.90946	0.0473008
Bik	2.91399	0.00364616
Slc7a7	2.91523	1.24855e-09
Parvg	2.91672	2.43565e-15
Mki67	2.9168	6.75574e-06
Il27	2.91935	0.0273538
Lbp	2.92385	0.00569926
Lair1	2.92641	1.44036e-14
Mzb1	2.92755	0.0399343
Gmfg	2.93028	1.58045e-09
Plaur	2.93459	7.09092e-11
Cd9	2.93532	8.30671e-18
Dnase2a	2.93532	6.26336e-14
Thbs1	2.9362	2.19603e-07
Mlph	2.93863	1.85025e-11
Scara5	2.94249	0.000102314
Parp9	2.94689	7.17566e-13
Ifitm1	2.94878	2.02567e-08
Lpxn	2.94882	5.77231e-11
Gm20707	2.94995	0.000158899
Hpn	2.95042	1.4804e-10
Adamts14	2.95068	2.09366e-06
Dok1	2.95178	5.11692e-11
Ndc80	2.95577	1.77539e-05
Lpl	2.95719	2.31469e-11
Tmem37	2.95966	6.13429e-06
Isg15	2.96076	3.59855e-10
Spint1	2.96213	1.13595e-10
Gm15539	2.96475	4.96752e-05
Syk	2.9713	4.3895e-10
Plin2	2.98536	3.27055e-09
AW112010	2.98915	2.16153e-06
Gm10369	2.99097	0.0355266
Tifab	2.99489	1.12292e-12
H2ac8	2.9986	0.00243013
Arpc1b	3.00098	3.92001e-15
Prokr1	3.00976	0.0427058
Abca1	3.0172	2.65947e-11
Cd79a	3.01903	0.00224907
Mlxipl	3.01941	1.28066e-16
Top2a	3.02031	1.80134e-10
Gm38386	3.02128	0.0124625
Hmox1	3.02266	1.06311e-11
Gm14040	3.02428	0.0214036
Sh2d6	3.03145	1.02752e-05
Tspan32	3.03181	5.51088e-05
Gm28901	3.03442	0.0448288
Lyn	3.03654	4.00795e-12
Nr1h4	3.04055	0.0373841
Pyroxd2	3.04335	2.10389e-19
Aif1	3.04398	1.54399e-15
Ltb	3.04621	0.00369071
Adamts12	3.04765	5.9672e-05
Gpsm3	3.05094	2.00782e-10
Pkp3	3.0546	0.0279394
Adam8	3.0561	1.26192e-06
Rtp4	3.06003	3.78894e-10
Traf1	3.06155	3.22144e-06
Nlrc3	3.06266	5.0722e-08
Ddx60	3.0629	4.82897e-08
Anxa3	3.06875	2.06454e-17
Uba7	3.07301	4.53906e-13
Dennd1c	3.07473	2.3021e-12
H4c11	3.07636	0.0205123
Vis1	3.07681	6.15709e-05
Gm44751	3.07761	0.000440613
Osmr	3.08064	6.52045e-19
Plcg2	3.0812	6.74771e-16
Ifitm3	3.08633	2.8e-12
H2-Q4	3.09703	2.01747e-12
2010008C14Rik	3.10411	0.00402384
Gm26542	3.10453	0.000979397
Nfam1	3.10756	3.13185e-13
Lhx8	3.11214	0.00176933
Tgif1	3.11924	1.59005e-13
Lum	3.12195	0.000165023
Cyth4	3.12922	1.10055e-16
Plau	3.13394	1.44036e-14
E330020D12Rik	3.13698	0.000308589
Pik3cg	3.13801	1.22795e-14
Gm44175	3.13856	0.016461
Rhoh	3.13977	2.2893e-10
Haao	3.13986	2.19603e-07
Rbm47	3.13997	1.00222e-06
Frrs1	3.14251	6.01847e-12
Aurkb	3.15411	0.000598369
Icam1	3.15414	9.38678e-11
Unc93b1	3.15867	3.92001e-15
Osgin1	3.16233	2.0446e-05
Tlr4	3.16552	1.26744e-12
Cdca2	3.16662	0.00878884
H2-DMb2	3.16981	0.000112264
Fes	3.1709	1.66792e-15
Psmb9	3.17656	1.33609e-10
Serping1	3.17668	1.77784e-05
Lrrc25	3.17767	7.40654e-07
Emp1	3.17884	5.79461e-09
Dock8	3.18105	4.75974e-15
Ighg2c	3.1842	0.0245898
Itgam	3.18955	4.57727e-16
Gm38317	3.19179	1.76243e-06
Serpine1	3.20271	2.39381e-10
S100a8	3.2059	0.00811698
Gbx1	3.21188	0.0205655
Il10ra	3.21463	2.44354e-14
Pld4	3.21567	6.99881e-19
Lgals9	3.21892	4.4357e-14
Wdfy4	3.22118	2.98506e-13
Ptpn22	3.22309	3.3732e-06
Asgr2	3.22313	0.0187705
Naip3-ps1	3.23418	0.00243614
Apbb1ip	3.23864	8.10927e-21
Igsf6	3.24014	3.77078e-09
Ctsc	3.24022	1.23637e-15
P2ry6	3.2448	5.28994e-13
Tap1	3.2452	1.46138e-11
Loxl2	3.25321	3.43096e-06
Tlr6	3.25361	5.18916e-11
Dhx58	3.25545	8.23204e-09
A630001G21Rik	3.25713	4.72922e-11
Gna14	3.26164	0.000102085
Il1b	3.26328	1.84077e-05
Ctsh	3.2685	9.55129e-16
Col1a1	3.2691	2.41861e-06
Hk2	3.27053	1.77733e-19
Apobec3	3.27131	2.84953e-12
Apobr	3.27147	2.31466e-11
Abcc3	3.27412	1.21148e-10
Zmynd15	3.2756	3.48309e-06
Gngt2	3.27578	4.89597e-09
Tgfbi	3.27653	1.34056e-09
Hck	3.27683	1.07134e-14
Tgfb1	3.27834	1.66557e-16
Gpr183	3.28513	2.52252e-15
Iqgap3	3.28906	6.15569e-14
Adgre1	3.28975	5.08296e-16
9930111J21Rik2	3.2907	6.64801e-18
Gm15753	3.299	3.82406e-05
5830428M24Rik	3.30129	0.0122325
NA	3.30553	0.00165911
Hcls1	3.31242	3.01775e-15
Slc37a2	3.31599	1.93698e-17
Xlr	3.31717	3.2388e-15
Parp14	3.31744	9.71006e-15
Olfml3	3.32089	2.57446e-21
Il1a	3.32289	1.16312e-08
Irf5	3.32512	7.63662e-14
Tnfrsf1b	3.3314	7.35286e-12
Guca1a	3.3317	0.0032557
Adam3	3.33216	6.70352e-05
Ifit1	3.3323	4.75974e-15
Tnfrsf14	3.33231	6.17634e-08
Gusb	3.33375	1.53092e-20
Sh3bp2	3.33714	4.36045e-18
Dhh	3.33769	0.00634637
Ncf2	3.33783	8.3264e-17
Clec4a1	3.34257	0.000262241
Gm50035	3.34486	1.0553e-08
Nckap1l	3.35836	1.96134e-18
Plxna4os1	3.36076	2.02136e-06
Tnfaip8l2	3.36267	4.4357e-14
Flnc	3.3656	5.62184e-20
Fcgr3	3.38808	2.1258e-19
C1s1	3.38973	1.01803e-06
Isg20	3.3909	7.50946e-09
Gna15	3.39233	3.57676e-13
Gpr171	3.39438	0.00270294
Lrmp	3.39569	6.0075e-18
Ikzf1	3.39895	1.28116e-17
Ms4a4a	3.39911	0.00103737
Clec5a	3.40211	2.66193e-14
H19	3.4073	0.00247413
Slc44a3	3.40736	0.0277675
Cmklr1	3.41213	2.39059e-14
Htr2b	3.41317	7.77334e-09
Nox4	3.41399	0.000257493
Ptafr	3.41551	1.50919e-10
Ucp2	3.41593	9.87342e-14
Gm5970	3.41682	0.0173828
Ptpn18	3.4174	6.88177e-12
Gm15538	3.4183	0.0342242
Cd300a	3.41838	8.59767e-05
Fermt3	3.41995	5.83504e-17
Abi3	3.42336	3.25074e-15
Ang	3.42517	1.1279e-18
Scgb3a1	3.42537	0.0107345
Gm7665	3.4256	0.0347789
Calhm6	3.42602	8.26315e-06
Grn	3.43773	1.05294e-21
Adgrg5	3.44055	0.0113313
Sash3	3.44588	3.26903e-12
Hexb	3.44721	3.50145e-22
Rab20	3.46093	4.24855e-08
Mmp19	3.46316	1.85025e-11
Cxcr4	3.46676	5.6403e-11
Arhgap30	3.46884	6.60573e-16
Lcp2	3.47445	1.14236e-13
Ms4a6b	3.47549	5.40637e-05
Cd109	3.47718	3.8164e-16
H2-DMb1	3.47994	4.5691e-12
Lhx5	3.48418	0.0484202
Klrd1	3.48688	0.00150088
Cd79b	3.4915	1.36632e-05
Dyrk4	3.49183	1.9026e-05
Afp	3.49465	0.0194479
Rab7b	3.49595	7.35286e-12
Tmem154	3.49631	2.23445e-10
Cxcl11	3.50553	0.0497553
Itgb7	3.51398	3.27216e-05
Pdcd1lg2	3.51621	0.0405222
Spi1	3.51766	1.04975e-16
Arhgap45	3.5181	3.37548e-19
Haspin	3.51915	0.000496798
Fgl2	3.52052	3.97244e-17
Lcp1	3.52418	6.33476e-15
3830403N18Rik	3.52752	0.0094167
Tnni2	3.52878	8.48924e-05
Vim	3.52933	8.38026e-17
Plek	3.5309	3.33539e-23
Phf11d	3.53647	1.37597e-10
B2m	3.5379	1.11667e-20
Cd247	3.53876	0.00134165
Cd28	3.53982	3.64399e-05
Tbxas1	3.5405	3.27317e-18
Gm14321	3.54324	0.00130876
Nlrp3	3.55156	3.09166e-16
Ccn5	3.5574	0.00121431
Rab32	3.56755	6.81317e-13
Snx20	3.56953	2.55388e-16
Cd86	3.57205	1.19666e-17
Gm13212	3.57346	3.70902e-06
Ltbp2	3.57946	0.0055163
Ifi203	3.58278	1.23346e-08
Xlr4a	3.58378	0.0111914
Rps15a-ps3	3.58527	0.0492797
Ms4a6d	3.58563	1.04371e-07
Il21r	3.58888	3.90098e-13
Slc28a2	3.59928	0.000954515
Mndal	3.59932	5.74715e-07
[truncated: 555 more rows]
