# Supplementary material for: Cortex-specific transcriptome profiling reveals upregulation of interferon-regulated genes after deeper cerebral hypoperfusion in mice
Source: Front Physiol. 2023 Mar 13;14:1056354. doi: 10.3389/fphys.2023.1056354 (PMC10040763; doi:10.3389/fphys.2023.1056354)
Supplement: Supplementary file 2 [file Table3.xlsx]

## Sheet: limma
IPA analysis was performed using limma
1. Top regulator effect networks according to IPA analysis post hypoperfusion.
Regulators	Disease & Functions	Consistency Score
dexmedetomidine	Cell movement	4.472
dexmedetomidine	Migration of cells	4.472
STING1	Immune response of cells	4.457
TLR4	Interaction of mononuclear leukocytes	4.426
TRAF3IP2	Activation of cells	4.264
2. Top canonical pathways from IPA analysis after hypoperfusion.
Name	P-value
Pathogen Induced Cytokine Storm Signaling Pathway	7.2e-56
Neuroinflammation Signaling Pathway	1.63e-31
Hepatic Fibrosis/Hepatic Stellate Cell Activation	1.87e-30
Phagosome Formation	2.11e-29
Multiple Sclerosis Signaling Pathway	2.66e-26
3. Top upstream regulators using IPA analysis following hypoperfusion.
Name	P-value
Lipopolysaccharide	7.36e-186
IFNG	2.13e-140
Immunoglobulin	6.58e-131
TNF	9.61e-118
IL-4	1.61e-103

## Sheet: DESeq2
IPA analysis was performed using DESeq2
1. Top regulator effect networks according to IPA analysis post hypoperfusion.
Regulators	Disease & Functions	Consistency Score
Lysophosphatidic acid	Migration of phagocytes	4.243
Hbb-b2	Migration of cells	4.146
Hbb-b2	Cell movement	4.051
STING1	Immune response of cells	4.051
TLR4	Interaction of mononuclear leukocytes	4.051
2. Top canonical pathways from IPA analysis after hypoperfusion.
Name	P-value
Hepatic Fibrosis / Hepatic Stellate cell Activation	1.13e-29
Neuroinflammation Signaling Pathway	1.1e-28
Phagosome Formation	2.46e-26
Role of Macrophages, Fibroblasts and Endothelial Cells in Rheumatoid Arthritis	1.77e-25
Role of Pattern Recognition Receptors in Recognition of Bacteria and Viruses	1.09e-22
3. Top upstream regulators using IPA analysis following hypoperfusion.
Name	P-value
Lipopolysaccharide	5.89e-172
IFNG	9.08e-125
TNF	3.99e-108
Immunoglobulin	5.94e-104
Interferon alpha	4.49e-96
