# Supplementary material for: Cortex-specific transcriptome profiling reveals upregulation of interferon-regulated genes after deeper cerebral hypoperfusion in mice
Source: Front Physiol. 2023 Mar 13;14:1056354. doi: 10.3389/fphys.2023.1056354 (PMC10040763; doi:10.3389/fphys.2023.1056354)
Supplement: Supplementary file 3 [file Table1.xlsx]

## Sheet: RNA-seq
Table S1: Quality control for RNA-seq.								qc_report						trimqc_report
condition	genotype	gender	age	tissue	Library name	Sequencer	Sequencing type	R1_reads	R1_GC%	R1_deduplicate	R2_reads	R2_GC%	R2_deduplicate	R1_reads	R1_GC%	R1_deduplicate	R2_reads	R2_GC%	R2_deduplicate	alignment rate
Sham	C57	male	14 weeks	right cortex_from_whole_brain	RNA_seq_Sham_1	Illumina NovaSeq 6000	PE150	21843466	50	0.50197	21843466	50	0.515377	21841604	50	0.502371	21841604	50	0.515544	0.9688
Sham	C57	male	14 weeks	right cortex_from_whole_brain	RNA_seq_Sham_2	Illumina NovaSeq 6000	PE150	19453230	50	0.506441	19453230	50	0.52817	19451479	50	0.506986	19451479	50	0.528438	0.9708
Sham	C57	male	14 weeks	right cortex_from_whole_brain	RNA_seq_Sham_3	Illumina NovaSeq 6000	PE150	20446294	49	0.511809	20446294	49	0.53038	20444468	50	0.512138	20444468	49	0.530539	0.9748
Sham	C57	male	14 weeks	right cortex_from_whole_brain	RNA_seq_Sham_4	Illumina NovaSeq 6000	PE150	19905290	50	0.507466	19905290	50	0.5263	19903549	50	0.507914	19903549	50	0.526649	0.9705
BCAS	C57	male	14 weeks	right cortex_from_whole_brain	RNA_seq_BCAS_1	Illumina NovaSeq 6000	PE150	25682171	50	0.483518	25682171	50	0.516451	25679858	50	0.4838	25679858	50	0.5166	0.9743
BCAS	C57	male	14 weeks	right cortex_from_whole_brain	RNA_seq_BCAS_2	Illumina NovaSeq 6000	PE150	22338026	50	0.503485	22338026	50	0.52211	22336035	50	0.503809	22336035	49	0.522231	0.9762
BCAS	C57	male	14 weeks	right cortex_from_whole_brain	RNA_seq_BCAS_3	Illumina NovaSeq 6000	PE150	21371327	50	0.511056	21371327	50	0.528776	21369388	50	0.51145	21369388	50	0.528919	0.9732
BCAS	C57	male	14 weeks	right cortex_from_whole_brain	RNA_seq_BCAS_4	Illumina NovaSeq 6000	PE150	20580345	50	0.524129	20580345	50	0.542671	20578336	50	0.524563	20578336	50	0.542847	0.9721
